# Supplementary material for: Effect of Physical Exercise and Genetic Background on Glucose Homeostasis and Liver/Muscle Proteomes in Mice
Source: MDPI journal article supplement (doi:10.3390/metabo12020117), 2022-01-25
Supplement: s1 [file s1]

**Table S1.** Proteins with expression significantly altered in the liver of SI (A/J, deionized water, no-exercise) and RI (129P3/J, deionized water, no-exercise) mice

| <sup>a</sup> Accession | Protein name                                                | PLGS  | <sup>b</sup> Ratio |
|------------------------|-------------------------------------------------------------|-------|--------------------|
| number                 |                                                             | Score | SI:RI              |
| Q8VCH0                 | 3-ketoacyl-CoA thiolase B_ peroxisomal                      | 68    | 4.31               |
| P10648                 | Glutathione S-transferase A2                                | 527   | 2.92               |
| O08807                 | Peroxiredoxin-4                                             | 70    | 2.86               |
| Q921H8                 | 3-ketoacyl-CoA thiolase A_ peroxisomal                      | 111   | 2.77               |
| P30115                 | Glutathione S-transferase A3                                | 527   | 2.72               |
| P13745                 | Glutathione S-transferase A1                                | 527   | 2.69               |
| Q6P8Q0                 | Glutathione S-transferase                                   | 527   | 2.69               |
| P62631                 | Elongation factor 1-alpha 2                                 | 56    | 2.64               |
| P49429                 | 4-hydroxyphenylpyruvate dioxygenase                         | 205   | 2.59               |
| P16015                 | Carbonic anhydrase 3                                        | 558   | 2.32               |
| P24472                 | Glutathione S-transferase A4                                | 30    | 2.16               |
| P0C0S6                 | Histone H2A.Z                                               | 246   | 2.12               |
| C0HKE2                 | Histone H2A type 1-C                                        | 246   | 2.10               |
| C0HKE9                 | Histone H2A type 1-P                                        | 246   | 2.10               |
| C0HKE3                 | Histone H2A type 1-D                                        | 246   | 2.08               |
| C0HKE5                 | Histone H2A type 1-G                                        | 246   | 2.08               |
| Q64523                 | Histone H2A type 2-C                                        | 246   | 2.08               |
| Q8BFU2                 | Histone H2A type 3                                          | 246   | 2.08               |
| Q8R1M2                 | Histone H2A.J                                               | 246   | 2.08               |
| Q3THW5                 | Histone H2A.V                                               | 246   | 2.08               |
| C0HKE1                 | Histone H2A type 1-B                                        | 246   | 2.05               |
| C0HKE4                 | Histone H2A type 1-E                                        | 246   | 2.05               |
| C0HKE6                 | Histone H2A type 1-I                                        | 246   | 2.05               |
| C0HKE8                 | Histone H2A type 1-O                                        | 246   | 2.05               |
| Q6GSS7                 | Histone H2A type 2-A                                        | 246   | 2.05               |
| Q64522                 | Histone H2A type 2-B                                        | 246   | 2.05               |
| P62806                 | Histone H4                                                  | 265   | 2.05               |
| Q8CGP5                 | Histone H2A type 1-F                                        | 246   | 2.03               |
| Q8CGP7                 | Histone H2A type 1-K                                        | 246   | 2.03               |
| C0HKE7                 | Histone H2A type 1-N                                        | 246   | 2.03               |
| P27661                 | Histone H2AX                                                | 246   | 2.03               |
| Q8CGP6                 | Histone H2A type 1-H                                        | 246   | 2.01               |
| P11352                 | Glutathione peroxidase 1                                    | 441   | 1.90               |
| Q9JHW9                 | Aldehyde dehydrogenase family 1 member A3                   | 46    | 1.70               |
| P50247                 | Adenosylhomocysteinase                                      | 327   | 1.68               |
| Q9CZS1                 | Aldehyde dehydrogenase X_ mitochondrial                     | 46    | 1.68               |
| Q9QXD6                 | Fructose-1_6-bisphosphatase 1                               | 261   | 1.65               |
| Q62148                 | Retinal dehydrogenase 2                                     | 46    | 1.65               |
| O35945                 | Aldehyde dehydrogenase_ cytosolic 1                         | 241   | 1.63               |
| P24549                 | Retinal dehydrogenase 1                                     | 317   | 1.63               |
| P47738                 | Aldehyde dehydrogenase_ mitochondrial                       | 237   | 1.62               |
| Q99LC5                 | Electron transfer flavoprotein subunit alpha_ mitochondrial | 114   | 1.62               |
| P24270                 | Catalase                                                    | 342   | 1.58               |
| P35700                 | Peroxiredoxin-1                                             | 284   | 1.58               |
| Q9DCW4                 | Electron transfer flavoprotein subunit beta                 | 236   | 1.55               |

|        |                                                       |      |      |
|--------|-------------------------------------------------------|------|------|
| P14152 | Malate dehydrogenase_ cytoplasmic                     | 230  | 1.54 |
| P08228 | Superoxide dismutase [Cu-Zn]                          | 123  | 1.52 |
| P54869 | Hydroxymethylglutaryl-CoA synthase_ mitochondrial     | 185  | 1.49 |
| Q64433 | 10 kDa heat shock protein_ mitochondrial              | 333  | 1.43 |
| P05202 | Aspartate aminotransferase_ mitochondrial             | 179  | 1.42 |
| Q64374 | Regucalcin                                            | 353  | 1.42 |
| P26443 | Glutamate dehydrogenase 1_ mitochondrial              | 154  | 1.36 |
| P11725 | Ornithine carbamoyltransferase_ mitochondrial         | 183  | 1.36 |
| P52760 | 2-iminobutanoate/2-iminopropanoate deaminase          | 221  | 1.35 |
| P12710 | Fatty acid-binding protein_ liver                     | 2940 | 1.35 |
| P15626 | Glutathione S-transferase Mu 2                        | 582  | 1.35 |
| Q61176 | Arginase-1                                            | 956  | 1.34 |
| Q8R5I6 | Glutathione S-transferase mu 4                        | 582  | 1.34 |
| Q80W21 | Glutathione S-transferase Mu 7                        | 582  | 1.34 |
| Q03265 | ATP synthase subunit alpha_ mitochondrial             | 293  | 1.32 |
| F6Y363 | Uncharacterized protein                               | 582  | 1.32 |
| P16460 | Argininosuccinate synthase                            | 570  | 1.31 |
| Q8BFZ3 | Beta-actin-like protein 2                             | 386  | 1.31 |
| P08249 | Malate dehydrogenase_ mitochondrial                   | 286  | 1.31 |
| P56480 | ATP synthase subunit beta_ mitochondrial              | 352  | 1.30 |
| Q8BWT1 | 3-ketoacyl-CoA thiolase_ mitochondrial                | 301  | 1.28 |
| P10126 | Elongation factor 1-alpha 1                           | 238  | 1.28 |
| P70694 | Estradiol 17 beta-dehydrogenase 5                     | 411  | 1.28 |
| P48774 | Glutathione S-transferase Mu 5                        | 87   | 1.28 |
| Q9QXF8 | Glycine N-methyltransferase                           | 274  | 1.28 |
| P63260 | Actin_ cytoplasmic 2                                  | 1328 | 1.26 |
| Q91Y97 | Fructose-bisphosphate aldolase B                      | 301  | 1.23 |
| P68033 | Actin_ alpha cardiac muscle 1                         | 1147 | 1.22 |
| P68134 | Actin_ alpha skeletal muscle                          | 1147 | 1.22 |
| P62737 | Actin_ aortic smooth muscle                           | 1147 | 1.22 |
| P60710 | Actin_ cytoplasmic 1                                  | 1328 | 1.22 |
| P63268 | Actin_ gamma-enteric smooth muscle                    | 1147 | 1.22 |
| P10649 | Glutathione S-transferase Mu 1                        | 368  | 1.19 |
| P16858 | Glyceraldehyde-3-phosphate dehydrogenase              | 493  | 1.17 |
| O35490 | Betaine--homocysteine S-methyltransferase 1           | 1350 | 1.15 |
| P25688 | Uricase                                               | 589  | 1.13 |
| Q8C196 | Carbamoyl-phosphate synthase [ammonia]_ mitochondrial | 1600 | 1.12 |
| P02089 | Hemoglobin subunit beta-2                             | 3090 | 1.06 |
| P02088 | Hemoglobin subunit beta-1                             | 4320 | 0.90 |
| P19157 | Glutathione S-transferase P 1                         | 396  | 0.89 |
| Q91VB8 | Alpha globin 1                                        | 2856 | 0.89 |
| P01942 | Hemoglobin subunit alpha                              | 2604 | 0.89 |
| P02104 | Hemoglobin subunit epsilon-Y2                         | 2045 | 0.89 |
| P46425 | Glutathione S-transferase P 2                         | 101  | 0.79 |
| V9GXQ2 | Uncharacterized protein                               | 183  | 0.66 |
| Q9CQ62 | 2_4-dienoyl-CoA reductase_ mitochondrial              | 214  | SI*  |
| Q78JT3 | 3-hydroxyanthranilate 3_4-dioxygenase                 | 651  | SI   |
| P47955 | 60S acidic ribosomal protein P1                       | 824  | SI   |
| Q99KI0 | Aconitate hydratase_ mitochondrial                    | 83   | SI   |

|        |                                                              |      |    |
|--------|--------------------------------------------------------------|------|----|
| P31786 | Acyl-CoA-binding protein                                     | 2938 | SI |
| Q91VA0 | Acyl-coenzyme A synthetase ACSM1_ mitochondrial              | 232  | SI |
| Q64437 | Alcohol dehydrogenase class 4 mu/sigma chain                 | 197  | SI |
| P28474 | Alcohol dehydrogenase class-3                                | 1575 | SI |
| Q8BH00 | Aldehyde dehydrogenase family 8 member A1                    | 166  | SI |
| Q9DBF1 | Alpha-aminoadipic semialdehyde dehydrogenase                 | 271  | SI |
| P00687 | Alpha-amylase 1                                              | 25   | SI |
| P17182 | Alpha-enolase                                                | 954  | SI |
| P05201 | Aspartate aminotransferase_ cytoplasmic                      | 461  | SI |
| P21550 | Beta-enolase                                                 | 219  | SI |
| P34914 | Bifunctional epoxide hydrolase 2                             | 835  | SI |
| Q8VCT4 | Carboxylesterase 1D                                          | 216  | SI |
| Q91WU0 | Carboxylesterase 1F                                          | 188  | SI |
| Q63880 | Carboxylesterase 3A                                          | 235  | SI |
| Q99KF0 | Caspase recruitment domain-containing protein 14             | 28   | SI |
| P56395 | Cytochrome b5                                                | 772  | SI |
| Q9CZ13 | Cytochrome b-c1 complex subunit 1_ mitochondrial             | 214  | SI |
| P19783 | Cytochrome c oxidase subunit 4 isoform 1_ mitochondrial      | 518  | SI |
| P12787 | Cytochrome c oxidase subunit 5A_ mitochondrial               | 561  | SI |
| Q64458 | Cytochrome P450 2C29                                         | 222  | SI |
| P28271 | Cytoplasmic aconitate hydratase                              | 84   | SI |
| O35215 | D-dopachrome decarboxylase                                   | 3765 | SI |
| Q8CHT0 | Delta-1-pyrroline-5-carboxylate dehydrogenase_ mitochondrial | 463  | SI |
| Q3U319 | E3 ubiquitin-protein ligase BRE1B                            | 26   | SI |
| Q8BL66 | Early endosome antigen 1                                     | 17   | SI |
| P42125 | Enoyl-CoA delta isomerase 1_ mitochondrial                   | 283  | SI |
| P19096 | Fatty acid synthase                                          | 36   | SI |
| Q91XD4 | Formimidoyltransferase-cyclodeaminase                        | 247  | SI |
| P35505 | Fumarylacetoacetase                                          | 980  | SI |
| Q64467 | Glyceraldehyde-3-phosphate dehydrogenase_ testis-specific    | 109  | SI |
| Q8CBB6 | Histone H2B                                                  | 3067 | SI |
| P70696 | Histone H2B type 1-A                                         | 1718 | SI |
| Q64475 | Histone H2B type 1-B                                         | 3067 | SI |
| Q6ZWY9 | Histone H2B type 1-C/E/G                                     | 3067 | SI |
| P10853 | Histone H2B type 1-F/J/L                                     | 3067 | SI |
| Q64478 | Histone H2B type 1-H                                         | 3067 | SI |
| Q8CGP1 | Histone H2B type 1-K                                         | 3067 | SI |
| P10854 | Histone H2B type 1-M                                         | 3067 | SI |
| Q8CGP2 | Histone H2B type 1-P                                         | 3067 | SI |
| Q64525 | Histone H2B type 2-B                                         | 3067 | SI |
| Q64524 | Histone H2B type 2-E                                         | 2684 | SI |
| Q9D2U9 | Histone H2B type 3-A                                         | 2684 | SI |
| Q8CGP0 | Histone H2B type 3-B                                         | 2684 | SI |
| O88844 | Isocitrate dehydrogenase [NADP] cytoplasmic                  | 250  | SI |
| P54071 | Isocitrate dehydrogenase [NADP]_ mitochondrial               | 174  | SI |
| Q9CPU0 | Lactoylglutathione lyase                                     | 944  | SI |
| P41216 | Long-chain-fatty-acid--CoA ligase 1                          | 572  | SI |
| P11588 | Major urinary protein 1                                      | 389  | SI |
| P04938 | Major urinary protein 11                                     | 389  | SI |

|        |                                                            |      |    |
|--------|------------------------------------------------------------|------|----|
| P11589 | Major urinary protein 2                                    | 389  | SI |
| P11591 | Major urinary protein 5                                    | 98   | SI |
| P02762 | Major urinary protein 6                                    | 389  | SI |
| Q9JM52 | Misshapen-like kinase 1                                    | 86   | SI |
| Q8K009 | Mitochondrial 10-formyltetrahydrofolate dehydrogenase      | 199  | SI |
| P97820 | Mitogen-activated protein kinase kinase kinase kinase 4    | 96   | SI |
| Q8BZW8 | NHL repeat-containing protein 2                            | 37   | SI |
| P32020 | Non-specific lipid-transfer protein                        | 253  | SI |
| F6ZDS4 | Nucleoprotein TPR                                          | 23   | SI |
| P29758 | Ornithine aminotransferase_ mitochondrial                  | 318  | SI |
| P17742 | Peptidyl-prolyl cis-trans isomerase A                      | 420  | SI |
| O08709 | Peroxiredoxin-6                                            | 457  | SI |
| Q9DBM2 | Peroxisomal bifunctional enzyme                            | 101  | SI |
| P09411 | Phosphoglycerate kinase 1                                  | 136  | SI |
| P09041 | Phosphoglycerate kinase 2                                  | 78   | SI |
| Q8VCR7 | Protein ABHD14B                                            | 588  | SI |
| P27773 | Protein disulfide-isomerase A3                             | 209  | SI |
| P09103 | Protein disulfide-isomerase                                | 222  | SI |
| O88451 | Retinol dehydrogenase 7                                    | 110  | SI |
| P17563 | Selenium-binding protein 1                                 | 946  | SI |
| Q63836 | Selenium-binding protein 2                                 | 940  | SI |
| Q07417 | Short-chain specific acyl-CoA dehydrogenase_ mitochondrial | 246  | SI |
| Q64442 | Sorbitol dehydrogenase                                     | 347  | SI |
| P38647 | Stress-70 protein_ mitochondrial                           | 80   | SI |
| P52196 | Thiosulfate sulfurtransferase                              | 231  | SI |
| B9EKN8 | TRAF2 and NCK interacting kinase                           | 86   | SI |
| P83510 | Traf2 and NCK-interacting protein kinase                   | 86   | SI |
| Q01853 | Transitional endoplasmic reticulum ATPase                  | 45   | SI |
| P40142 | Transketolase                                              | 76   | SI |
| Q8BMS1 | Trifunctional enzyme subunit alpha_ mitochondrial          | 107  | SI |
| Q8VC30 | Triokinase/FMN cyclase                                     | 209  | SI |
| P17751 | Triosephosphate isomerase                                  | 1172 | SI |
| P68369 | Tubulin alpha-1A chain                                     | 299  | SI |
| P05213 | Tubulin alpha-1B chain                                     | 299  | SI |
| P68373 | Tubulin alpha-1C chain                                     | 299  | SI |
| P05214 | Tubulin alpha-3 chain                                      | 247  | SI |
| P68368 | Tubulin alpha-4A chain                                     | 247  | SI |
| Q9JJZ2 | Tubulin alpha-8 chain                                      | 247  | SI |
| Q9ERD7 | Tubulin beta-3 chain                                       | 47   | SI |
| Q9D6F9 | Tubulin beta-4A chain                                      | 152  | SI |
| P68372 | Tubulin beta-4B chain                                      | 144  | SI |
| P99024 | Tubulin beta-5 chain                                       | 47   | SI |
| E9Q3T0 | Uncharacterized protein                                    | 685  | SI |
| Q8VC12 | Urocanate hydratase                                        | 38   | SI |
| Q8R164 | Valacyclovir hydrolase                                     | 179  | SI |
| Q80VW5 | Whirlin                                                    | 22   | SI |
| P05977 | Myosin light chain 1/3_ skeletal muscle isoform            | 452  | RI |
| Q5SX40 | Myosin-1                                                   | 96   | RI |
| Q5SX39 | Myosin-4                                                   | 105  | RI |

|        |              |     |    |
|--------|--------------|-----|----|
| Q02566 | Myosin-6     | 63  | RI |
| Q91Z83 | Myosin-7     | 63  | RI |
| P13542 | Myosin-8     | 96  | RI |
| Q99LX0 | Protein DJ-1 | 172 | RI |

<sup>a</sup>Identification is based on proteins ID from UniProt protein database, reviewed only (<http://www.uniprot.org/>).

<sup>b</sup>Proteins with expression significantly altered are organized according to the ratio.

\*Indicates unique proteins in alphabetical order.

**Table S2.** Proteins with expression significantly altered in the liver of SII (A/J, water containing 50 ppm F, no-exercise) and RII (129P3/J, water containing 50 ppm F, no-exercise) mice

| <sup>a</sup> Acession number | Protein name                                                | PLGS Score | <sup>b</sup> Ratio SII:RII |
|------------------------------|-------------------------------------------------------------|------------|----------------------------|
| V9GXA7                       | Uncharacterized protein                                     | 74         | 3.35                       |
| V9GXQ2                       | Uncharacterized protein                                     | 35         | 2.89                       |
| P16015                       | Carbonic anhydrase 3                                        | 402        | 2.64                       |
| Q9QXD6                       | Fructose-1,6-bisphosphatase 1                               | 236        | 2.03                       |
| P16460                       | Argininosuccinate synthase                                  | 195        | 1.97                       |
| P02088                       | Hemoglobin subunit beta-1                                   | 3980       | 1.97                       |
| P02104                       | Hemoglobin subunit epsilon-Y2                               | 1376       | 1.95                       |
| Q91VB8                       | Alpha globin 1                                              | 4327       | 1.84                       |
| P16858                       | Glyceraldehyde-3-phosphate dehydrogenase                    | 641        | 1.79                       |
| P02089                       | Hemoglobin subunit beta-2                                   | 2526       | 1.77                       |
| B2RQC6                       | CAD protein                                                 | 8          | 1.68                       |
| P50247                       | Adenosylhomocysteinase                                      | 270        | 1.60                       |
| P24549                       | Retinal dehydrogenase 1                                     | 175        | 1.58                       |
| P11352                       | Glutathione peroxidase 1                                    | 626        | 1.57                       |
| P07724                       | Serum albumin                                               | 245        | 1.55                       |
| O35945                       | Aldehyde dehydrogenase_ cytosolic 1                         | 143        | 1.52                       |
| P00329                       | Alcohol dehydrogenase 1                                     | 180        | 1.51                       |
| P08249                       | Malate dehydrogenase_ mitochondrial                         | 140        | 1.48                       |
| P24270                       | Catalase                                                    | 351        | 1.46                       |
| Q99LC5                       | Electron transfer flavoprotein subunit alpha_ mitochondrial | 111        | 1.46                       |
| P01942                       | Hemoglobin subunit alpha                                    | 4327       | 1.46                       |
| P10126                       | Elongation factor 1-alpha 1                                 | 475        | 1.40                       |
| Q9JHW9                       | Aldehyde dehydrogenase family 1 member A3                   | 37         | 1.36                       |
| P35700                       | Peroxiredoxin-1                                             | 153        | 1.35                       |
| Q62148                       | Retinal dehydrogenase 2                                     | 37         | 1.35                       |
| P70694                       | Estradiol 17 beta-dehydrogenase 5                           | 137        | 1.34                       |
| P12710                       | Fatty acid-binding protein_ liver                           | 3193       | 1.34                       |
| P54869                       | Hydroxymethylglutaryl-CoA synthase_ mitochondrial           | 165        | 1.32                       |
| P05202                       | Aspartate aminotransferase_ mitochondrial                   | 237        | 1.30                       |
| Q8BWT1                       | 3-ketoacyl-CoA thiolase_ mitochondrial                      | 319        | 1.28                       |
| P63268                       | Actin_ gamma-enteric smooth muscle                          | 1730       | 1.26                       |
| P47738                       | Aldehyde dehydrogenase_ mitochondrial                       | 226        | 1.26                       |
| Q9DCW4                       | Electron transfer flavoprotein subunit beta                 | 349        | 1.26                       |
| P68033                       | Actin_ alpha cardiac muscle 1                               | 1730       | 1.25                       |
| P62737                       | Actin_ aortic smooth muscle                                 | 1730       | 1.25                       |
| Q8C196                       | Carbamoyl-phosphate synthase [ammonia]_ mitochondrial       | 1655       | 1.25                       |
| P68134                       | Actin_ alpha skeletal muscle                                | 1730       | 1.23                       |

|        |                                                             |      |      |
|--------|-------------------------------------------------------------|------|------|
| P56480 | ATP synthase subunit beta_ mitochondrial                    | 390  | 1.23 |
| P11725 | Ornithine carbamoyltransferase_ mitochondrial               | 206  | 1.23 |
| Q64374 | Regucalcin                                                  | 361  | 1.23 |
| Q03265 | ATP synthase subunit alpha_ mitochondrial                   | 299  | 1.21 |
| P25688 | Uricase                                                     | 526  | 1.21 |
| P60710 | Actin_ cytoplasmic 1                                        | 2007 | 1.19 |
| O35490 | Betaine--homocysteine S-methyltransferase 1                 | 876  | 1.19 |
| P26443 | Glutamate dehydrogenase 1_ mitochondrial                    | 330  | 1.19 |
| P10649 | Glutathione S-transferase Mu 1                              | 790  | 1.19 |
| P63260 | Actin_ cytoplasmic 2                                        | 2007 | 1.16 |
| Q91Y97 | Fructose-bisphosphate aldolase B                            | 277  | 1.16 |
| Q8BFZ3 | Beta-actin-like protein 2                                   | 428  | 1.16 |
| Q91WS4 | S-methylmethionine--homocysteine S- methyltransferase BHMT2 | 485  | 1.14 |
| P19157 | Glutathione S-transferase P 1                               | 1249 | 1.13 |
| Q9QXF8 | Glycine N-methyltransferase                                 | 467  | 1.12 |
| P46425 | Glutathione S-transferase P 2                               | 491  | 0.61 |
| P49429 | 4-hydroxyphenylpyruvate dioxygenase                         | 220  | SII* |
| P31786 | Acyl-CoA-binding protein                                    | 592  | SII  |
| Q8VCT4 | Carboxylesterase 1D                                         | 84   | SII  |
| O35215 | D-dopachrome decarboxylase                                  | 206  | SII  |
| P62631 | Elongation factor 1-alpha 2                                 | 34   | SII  |
| P13745 | Glutathione S-transferase A1                                | 355  | SII  |
| P10648 | Glutathione S-transferase A2                                | 331  | SII  |
| P30115 | Glutathione S-transferase A3                                | 355  | SII  |
| P24472 | Glutathione S-transferase A4                                | 25   | SII  |
| P15626 | Glutathione S-transferase Mu 2                              | 408  | SII  |
| P48774 | Glutathione S-transferase Mu 5                              | 212  | SII  |
| Q80W21 | Glutathione S-transferase Mu 7                              | 416  | SII  |
| Q64467 | Glyceraldehyde-3-phosphate dehydrogenase_ testis-specific   |      | SII  |
| Q8CBB6 | Histone H2B                                                 | 590  | SII  |
| P70696 | Histone H2B type 1-A                                        | 391  | SII  |
| Q64475 | Histone H2B type 1-B                                        | 590  | SII  |
| Q6ZWY9 | Histone H2B type 1-C/E/G                                    | 590  | SII  |
| P10853 | Histone H2B type 1-F/J/L                                    | 590  | SII  |
| Q64478 | Histone H2B type 1-H                                        | 590  | SII  |
| Q8CGP1 | Histone H2B type 1-K                                        | 590  | SII  |
| P10854 | Histone H2B type 1-M                                        | 590  | SII  |
| Q8CGP2 | Histone H2B type 1-P                                        | 590  | SII  |
| Q64525 | Histone H2B type 2-B                                        | 590  | SII  |
| Q64524 | Histone H2B type 2-E                                        | 590  | SII  |
| Q9D2U9 | Histone H2B type 3-A                                        | 590  | SII  |
| Q8CGP0 | Histone H2B type 3-B                                        | 590  | SII  |
| P62806 | Histone H4                                                  | 161  | SII  |
| P06151 | L-lactate dehydrogenase A chain                             | 116  | SII  |
| P14152 | Malate dehydrogenase_ cytoplasmic                           | 376  | SII  |
| O08807 | Peroxiredoxin-4                                             | 119  | SII  |
| O08709 | Peroxiredoxin-6                                             | 36   | SII  |
| F6Y363 | Uncharacterized protein                                     | 408  | SII  |
| P11588 | Major urinary protein 1                                     | 849  | RII  |

|        |                                     |     |     |
|--------|-------------------------------------|-----|-----|
| P04938 | Major urinary protein 11            | 849 | RII |
| B5X0G2 | Major urinary protein 17            | 849 | RII |
| A2BIM8 | Major urinary protein 18            | 849 | RII |
| P11589 | Major urinary protein 2             | 849 | RII |
| P11591 | Major urinary protein 5             | 811 | RII |
| P02762 | Major urinary protein 6             | 849 | RII |
| P32020 | Non-specific lipid-transfer protein | 82  | RII |

<sup>a</sup>Identification is based on proteins ID from UniProt protein database, reviewed only (<http://www.uniprot.org/>).

<sup>b</sup>Proteins with expression significantly altered are organized according to the ratio.

\*Indicates unique proteins in alphabetical order.

**Table S3.** Proteins with expression significantly altered in the liver of SIII (A/J, water containing 50 ppm F, exercise) and RIII (129P3/J, water containing 50 ppm F, exercise) mice

| <sup>a</sup> Acession number | Protein name                                                | PLGS Score | <sup>b</sup> Ratio SIII:RIII |
|------------------------------|-------------------------------------------------------------|------------|------------------------------|
| P16015                       | Carbonic anhydrase 3                                        | 3069       | 2.94                         |
| P12710                       | Fatty acid-binding protein_liver                            | 21785      | 2.05                         |
| Q61176                       | Arginase-1                                                  | 4188       | 1.82                         |
| O35945                       | Aldehyde dehydrogenase_cytosolic 1                          | 1018       | 1.79                         |
| Q8C196                       | Carbamoyl-phosphate synthase [ammonia]_ mitochondrial       | 8837       | 1.77                         |
| P02088                       | Hemoglobin subunit beta-1                                   | 27458      | 1.67                         |
| P54869                       | Hydroxymethylglutaryl-CoA synthase_ mitochondrial           | 1254       | 1.67                         |
| O35490                       | Betaine--homocysteine S-methyltransferase 1                 | 5948       | 1.63                         |
| P24549                       | Retinal dehydrogenase 1                                     | 1374       | 1.63                         |
| P16858                       | Glyceraldehyde-3-phosphate dehydrogenase                    | 2946       | 1.62                         |
| Q9CZS1                       | Aldehyde dehydrogenase X_ mitochondrial                     | 89         | 1.58                         |
| P02104                       | Hemoglobin subunit epsilon-Y2                               | 1854       | 1.57                         |
| Q9JHW9                       | Aldehyde dehydrogenase family 1 member A3                   | 89         | 1.55                         |
| Q62148                       | Retinal dehydrogenase 2                                     | 89         | 1.49                         |
| Q91Y97                       | Fructose-bisphosphate aldolase B                            | 3833       | 1.38                         |
| O35215                       | D-dopachrome decarboxylase                                  | 1061       | 1.32                         |
| P10649                       | Glutathione S-transferase Mu 1                              | 12177      | 1.28                         |
| P11725                       | Ornithine carbamoyltransferase_ mitochondrial               | 1289       | 1.28                         |
| P08228                       | Superoxide dismutase [Cu-Zn]                                | 1918       | 1.28                         |
| P26443                       | Glutamate dehydrogenase 1_ mitochondrial                    | 1955       | 1.27                         |
| P02089                       | Hemoglobin subunit beta-2                                   | 9125       | 1.21                         |
| Q91WS4                       | S-methylmethionine--homocysteine S- methyltransferase BHMT2 | 1884       | 1.13                         |
| P68134                       | Actin_ alpha skeletal muscle                                | 8945       | 1.12                         |
| P68033                       | Actin_ alpha cardiac muscle 1                               | 8949       | 1.09                         |
| P62737                       | Actin_ aortic smooth muscle                                 | 8945       | 1.09                         |
| P63268                       | Actin_ gamma-enteric smooth muscle                          | 8945       | 1.09                         |
| P01942                       | Hemoglobin subunit alpha                                    | 11151      | 0.95                         |
| P60710                       | Actin_ cytoplasmic 1                                        | 10876      | 0.94                         |
| Q8BFZ3                       | Beta-actin-like protein 2                                   | 2497       | 0.80                         |
| P52760                       | 2-iminobutanoate/2-iminopropanoate deaminase                | 799        | 0.79                         |
| Q05920                       | Pyruvate carboxylase_ mitochondrial                         | 128        | 0.77                         |
| P05202                       | Aspartate aminotransferase_ mitochondrial                   | 1309       | 0.76                         |
| Q91XD4                       | Formimidoyltransferase-cyclodeaminase                       | 494        | 0.75                         |
| P63038                       | 60 kDa heat shock protein_ mitochondrial                    | 306        | 0.73                         |

|               |                                                             |      |      |
|---------------|-------------------------------------------------------------|------|------|
| Q99LB7        | Sarcosine dehydrogenase_ mitochondrial                      | 285  | 0.71 |
| P99029        | Peroxiredoxin-5_ mitochondrial                              | 548  | 0.70 |
| Q8VCN5        | Cystathionine gamma-lyase                                   | 507  | 0.69 |
| Q99LC5        | Electron transfer flavoprotein subunit alpha_ mitochondrial | 466  | 0.68 |
| Q9DCW4        | Electron transfer flavoprotein subunit beta                 | 3282 | 0.68 |
| P25688        | Uricase                                                     | 3095 | 0.68 |
| P08249        | Malate dehydrogenase_ mitochondrial                         | 1105 | 0.67 |
| Q8VCT4        | Carboxylesterase 1D                                         | 240  | 0.66 |
| P07724        | Serum albumin                                               | 1088 | 0.65 |
| Q8CGP5        | Histone H2A type 1-F                                        | 921  | 0.64 |
| Q64433        | 10 kDa heat shock protein_ mitochondrial                    | 1588 | 0.64 |
| P12787        | Cytochrome c oxidase subunit 5A_ mitochondrial              | 648  | 0.64 |
| Q9CQ62        | 2_4-dienoyl-CoA reductase_ mitochondrial                    | 68   | 0.63 |
| A0A0N4SV<br>E | Uncharacterized protein                                     | 2588 | 0.63 |
| P11679        | Keratin_ type II cytoskeletal 8                             | 207  | 0.63 |
| Q64522        | Histone H2A type 2-B                                        | 921  | 0.62 |
| Q03265        | ATP synthase subunit alpha_ mitochondrial                   | 1776 | 0.62 |
| B2RQC6        | CAD protein                                                 | 58   | 0.62 |
| Q8R1M2        | Histone H2A.J                                               | 921  | 0.61 |
| P14152        | Malate dehydrogenase_ cytoplasmic                           | 1349 | 0.61 |
| P31786        | Acyl-CoA-binding protein                                    | 1514 | 0.61 |
| P00329        | Alcohol dehydrogenase 1                                     | 1008 | 0.61 |
| Q64523        | Histone H2A type 2-C                                        | 921  | 0.61 |
| P0C0S6        | Histone H2A.Z                                               | 921  | 0.61 |
| P27661        | Histone H2AX                                                | 921  | 0.61 |
| O09173        | Homogentisate 1_2-dioxygenase                               | 232  | 0.61 |
| C0HKE3        | Histone H2A type 1-D                                        | 921  | 0.60 |
| C0HKE6        | Histone H2A type 1-I                                        | 921  | 0.60 |
| Q6GSS7        | Histone H2A type 2-A                                        | 921  | 0.60 |
| Q3THW5        | Histone H2A.V                                               | 921  | 0.60 |
| Q8K009        | Mitochondrial 10-formyltetrahydrofolate dehydrogenase       | 133  | 0.60 |
| C0HKE8        | Histone H2A type 1-O                                        | 921  | 0.59 |
| P20029        | 78 kDa glucose-regulated protein                            | 633  | 0.59 |
| P56480        | ATP synthase subunit beta_ mitochondrial                    | 2012 | 0.59 |
| Q9QXD6        | Fructose-1_6-bisphosphatase 1                               | 1052 | 0.59 |
| C0HKE1        | Histone H2A type 1-B                                        | 921  | 0.59 |
| C0HKE2        | Histone H2A type 1-C                                        | 921  | 0.59 |
| C0HKE5        | Histone H2A type 1-G                                        | 921  | 0.59 |
| Q8CGP6        | Histone H2A type 1-H                                        | 921  | 0.59 |
| Q8CGP7        | Histone H2A type 1-K                                        | 921  | 0.59 |
| C0HKE9        | Histone H2A type 1-P                                        | 921  | 0.59 |
| P62806        | Histone H4                                                  | 801  | 0.59 |
| V9GXA7        | Uncharacterized protein                                     | 771  | 0.59 |
| Q78JT3        | 3-hydroxyanthranilate 3_4-dioxygenase                       | 493  | 0.59 |
| P47738        | Aldehyde dehydrogenase_ mitochondrial                       | 1659 | 0.59 |
| Q8BFU2        | Histone H2A type 3                                          | 921  | 0.58 |
| C0HKE4        | Histone H2A type 1-E                                        | 921  | 0.58 |
| C0HKE7        | Histone H2A type 1-N                                        | 921  | 0.58 |



|        |                                                                     |      |      |
|--------|---------------------------------------------------------------------|------|------|
| Q8BWT1 | 3-ketoacyl-CoA thiolase_ mitochondrial                              | 1849 | 0.58 |
| Q9EQ20 | Methylmalonate-semialdehyde dehydrogenase[acylating]_ mitochondrial | 271  | 0.57 |
| P05201 | Aspartate aminotransferase_ cytoplasmic                             | 382  | 0.56 |
| Q8R0Y6 | Cytosolic 10-formyltetrahydrofolate dehydrogenase                   | 3301 | 0.56 |
| Q64475 | Histone H2B type 1-B                                                | 1475 | 0.56 |
| P10853 | Histone H2B type 1-F/J/L                                            | 1475 | 0.56 |
| Q64478 | Histone H2B type 1-H                                                | 1475 | 0.56 |
| Q8CGP1 | Histone H2B type 1-K                                                | 1475 | 0.56 |
| Q8CGP2 | Histone H2B type 1-P                                                | 1475 | 0.56 |
| Q64525 | Histone H2B type 2-B                                                | 1475 | 0.56 |
| Q9D2U9 | Histone H2B type 3-A                                                | 1155 | 0.56 |
| P24270 | Catalase                                                            | 3316 | 0.55 |
| P11352 | Glutathione peroxidase 1                                            | 2205 | 0.55 |
| Q6ZWY9 | Histone H2B type 1-C/E/G                                            | 1475 | 0.55 |
| P10854 | Histone H2B type 1-M                                                | 1475 | 0.55 |
| Q64524 | Histone H2B type 2-E                                                | 1155 | 0.55 |
| Q8CGP0 | Histone H2B type 3-B                                                | 1155 | 0.55 |
| P49429 | 4-hydroxyphenylpyruvate dioxygenase                                 | 1665 | 0.55 |
| P35700 | Peroxiredoxin-1                                                     | 2693 | 0.55 |
| P70696 | Histone H2B type 1-A                                                | 587  | 0.54 |
| Q01768 | Nucleoside diphosphate kinase B                                     | 584  | 0.53 |
| Q91X83 | S-adenosylmethionine synthase isoform type-1                        | 1571 | 0.53 |
| P70694 | Estradiol 17 beta-dehydrogenase 5                                   | 2293 | 0.52 |
| P19157 | Glutathione S-transferase P 1                                       | 5065 | 0.52 |
| P56395 | Cytochrome b5                                                       | 998  | 0.51 |
| P32020 | Non-specific lipid-transfer protein                                 | 522  | 0.47 |
| P35505 | Fumarylacetoacetase                                                 | 812  | 0.46 |
| P50247 | Adenosylhomocysteinase                                              | 5869 | 0.46 |
| Q8QZT1 | Acetyl-CoA acetyltransferase_ mitochondrial                         | 959  | 0.45 |
| P16460 | Argininosuccinate synthase                                          | 2388 | 0.44 |
| P62631 | Elongation factor 1-alpha 2                                         | 427  | 0.43 |
| O08807 | Peroxiredoxin-4                                                     | 518  | 0.42 |
| F6Y363 | Uncharacterized protein                                             | 3705 | 0.41 |
| P15626 | Glutathione S-transferase Mu 2                                      | 3705 | 0.41 |
| Q80W21 | Glutathione S-transferase Mu 7                                      | 3705 | 0.41 |
| Q9QXF8 | Glycine N-methyltransferase                                         | 3693 | 0.41 |
| P48774 | Glutathione S-transferase Mu 5                                      | 163  | 0.40 |
| P13745 | Glutathione S-transferase A1                                        | 2794 | 0.37 |
| P10648 | Glutathione S-transferase A2                                        | 2747 | 0.37 |
| P30115 | Glutathione S-transferase A3                                        | 3206 | 0.37 |
| Q9CPU0 | Lactoylglutathione lyase                                            | 407  | SIH* |
| Q921H8 | 3-ketoacyl-CoA thiolase A_ peroxisomal                              | 613  | RHH  |
| Q8VCH0 | 3-ketoacyl-CoA thiolase B_ peroxisomal                              | 613  | RHH  |
| P14206 | 40S ribosomal protein SA                                            | 192  | RHH  |
| P47955 | 60S acidic ribosomal protein P1                                     | 1191 | RHH  |
| Q91WG0 | Acylcarnitine hydrolase                                             | 17   | RHH  |
| Q91VA0 | Acyl-coenzyme A synthetase ACSM1_ mitochondrial                     | 64   | RHH  |
| Q8QZR5 | Alanine aminotransferase 1                                          | 102  | RHH  |

|        |                                                              |      |      |
|--------|--------------------------------------------------------------|------|------|
| P28474 | Alcohol dehydrogenase class-3                                | 1777 | RIII |
| Q8BH00 | Aldehyde dehydrogenase family 8 member A1                    | 77   | RIII |
| Q9DBF1 | Alpha-aminoadipic semialdehyde dehydrogenase                 | 423  | RIII |
| P17182 | Alpha-enolase                                                | 769  | RIII |
| P21550 | Beta-enolase                                                 | 71   | RIII |
| P34914 | Bifunctional epoxide hydrolase 2                             | 438  | RIII |
| Q8VCU1 | Carboxylesterase 3B                                          | 89   | RIII |
| P19783 | Cytochrome c oxidase subunit 4 isoform 1_ mitochondrial      | 245  | RIII |
| Q8CHT0 | Delta-1-pyrroline-5-carboxylate dehydrogenase_ mitochondrial | 328  | RIII |
| Q8BVI4 | Dihydropteridine reductase                                   | 368  | RIII |
| Q9DBT9 | Dimethylglycine dehydrogenase_ mitochondrial                 | 50   | RIII |
| Q8BH95 | Enoyl-CoA hydratase_ mitochondrial                           | 105  | RIII |
| P19096 | Fatty acid synthase                                          | 25   | RIII |
| P15105 | Glutamine synthetase                                         | 391  | RIII |
| P24472 | Glutathione S-transferase A4                                 | 35   | RIII |
| Q64467 | Glyceraldehyde-3-phosphate dehydrogenase_ testis-specific    | 45   | RIII |
| Q61696 | Heat shock 70 kDa protein 1A                                 | 157  | RIII |
| P17879 | Heat shock 70 kDa protein 1B                                 | 157  | RIII |
| P16627 | Heat shock 70 kDa protein 1-like                             | 157  | RIII |
| P63017 | Heat shock cognate 71 kDa protein                            | 741  | RIII |
| Q9CQN1 | Heat shock protein 75 kDa_ mitochondrial                     | 187  | RIII |
| P07901 | Heat shock protein HSP 90-alpha                              | 218  | RIII |
| P11499 | Heat shock protein HSP 90-beta                               | 510  | RIII |
| P17156 | Heat shock-related 70 kDa protein 2                          | 250  | RIII |
| P40936 | Indolethylamine N-methyltransferase                          | 267  | RIII |
| Q9D819 | Inorganic pyrophosphatase                                    | 254  | RIII |
| O88844 | Isocitrate dehydrogenase [NADP] cytoplasmic                  | 99   | RIII |
| P05784 | Keratin_ type I cytoskeletal 18                              | 115  | RIII |
| Q99M73 | Keratin_ type II cuticular Hb4                               | 7    | RIII |
| P06151 | L-lactate dehydrogenase A chain                              | 518  | RIII |
| P16125 | L-lactate dehydrogenase B chain                              | 293  | RIII |
| P00342 | L-lactate dehydrogenase C chain                              | 293  | RIII |
| P41216 | Long-chain-fatty-acid--CoA ligase 1                          | 375  | RIII |
| P11588 | Major urinary protein 1                                      | 1114 | RIII |
| P04938 | Major urinary protein 11                                     | 1114 | RIII |
| B5X0G2 | Major urinary protein 17                                     | 1114 | RIII |
| A2BIM8 | Major urinary protein 18                                     | 1114 | RIII |
| P11589 | Major urinary protein 2                                      | 1114 | RIII |
| P11591 | Major urinary protein 5                                      | 1114 | RIII |
| P02762 | Major urinary protein 6                                      | 1114 | RIII |
| Q8R4H7 | N-acetylglutamate synthase_ mitochondrial                    | 207  | RIII |
| P17742 | Peptidyl-prolyl cis-trans isomerase A                        | 967  | RIII |
| P24369 | Peptidyl-prolyl cis-trans isomerase B                        | 111  | RIII |
| O08709 | Peroxiredoxin-6                                              | 710  | RIII |
| P51660 | Peroxisomal multifunctional enzyme type 2                    | 130  | RIII |
| P70296 | Phosphatidylethanolamine-binding protein 1                   | 506  | RIII |
| P09411 | Phosphoglycerate kinase 1                                    | 124  | RIII |
| P09041 | Phosphoglycerate kinase 2                                    | 82   | RIII |
| Q8VCR7 | Protein ABHD14B                                              | 353  | RIII |

|        |                                                   |      |      |
|--------|---------------------------------------------------|------|------|
| P09103 | Protein disulfide-isomerase                       | 144  | RIII |
| P27773 | Protein disulfide-isomerase A3                    | 90   | RIII |
| Q99LX0 | Protein DJ-1                                      | 506  | RIII |
| Q8C627 | Protein FAM221B                                   | 103  | RIII |
| O55125 | Protein NipSnap homolog 1                         | 560  | RIII |
| Q2PZL6 | Protocadherin Fat 4                               | 15   | RIII |
| Q8QZR3 | Pyrethroid hydrolase Ces2a                        | 104  | RIII |
| Q3THS6 | S-adenosylmethionine synthase isoform type-2      | 309  | RIII |
| Q99J08 | SEC14-like protein 2                              | 260  | RIII |
| P17563 | Selenium-binding protein 1                        | 442  | RIII |
| Q63836 | Selenium-binding protein 2                        | 423  | RIII |
| Q9R0P3 | S-formylglutathione hydrolase                     | 331  | RIII |
| Q64442 | Sorbitol dehydrogenase                            | 646  | RIII |
| P38647 | Stress-70 protein_ mitochondrial                  | 129  | RIII |
| Q8R086 | Sulfite oxidase_ mitochondrial                    | 54   | RIII |
| Q01853 | Transitional endoplasmic reticulum ATPase         | 134  | RIII |
| Q8BMS1 | Trifunctional enzyme subunit alpha_ mitochondrial | 290  | RIII |
| Q99JY0 | Trifunctional enzyme subunit beta_ mitochondrial  | 80   | RIII |
| P17751 | Triosephosphate isomerase                         | 1762 | RIII |
| Q9R1R2 | Tripartite motif-containing protein 3             | 153  | RIII |
| Q3UX10 | Tubulin alpha chain-like 3                        | 10   | RIII |
| P68369 | Tubulin alpha-1A chain                            | 377  | RIII |
| P05213 | Tubulin alpha-1B chain                            | 381  | RIII |
| P68373 | Tubulin alpha-1C chain                            | 377  | RIII |
| P05214 | Tubulin alpha-3 chain                             | 236  | RIII |
| P68368 | Tubulin alpha-4A chain                            | 241  | RIII |
| Q9JJZ2 | Tubulin alpha-8 chain                             | 236  | RIII |
| Q7TMM9 | Tubulin beta-2A chain                             | 333  | RIII |
| Q9CWF2 | Tubulin beta-2B chain                             | 314  | RIII |
| Q9ERD7 | Tubulin beta-3 chain                              | 230  | RIII |
| Q9D6F9 | Tubulin beta-4A chain                             | 447  | RIII |
| P68372 | Tubulin beta-4B chain                             | 470  | RIII |
| P99024 | Tubulin beta-5 chain                              | 470  | RIII |
| E9Q3T0 | Uncharacterized protein                           | 560  | RIII |

<sup>a</sup>Identification is based on proteins ID from UniProt protein database, reviewed only (<http://www.uniprot.org/>).

<sup>b</sup>Proteins with expression significantly altered are organized according to the ratio.

\*Indicates unique proteins in alphabetical order.

**Table S4.** Proteins with expression significantly altered in the gastrocnemius of SI (A/J, deionized water, no-exercise) and RI (129P3/J, deionized water, no-exercise) mice

| <sup>a</sup> Accession number | Protein name                                        | PLGS Score | <sup>b</sup> Ratio SI:RI |
|-------------------------------|-----------------------------------------------------|------------|--------------------------|
| Q62388                        | Serine-protein kinase ATM                           | 92         | 2.18                     |
| Q7TMW6                        | Cytosolic Fe-S cluster assembly factor              | 97         | 2.10                     |
| Q60974                        | Nuclear receptor corepressor 1                      | 110        | 1.58                     |
| Q08481                        | Platelet endothelial cell adhesion molecule         | 68         | 1.57                     |
| Q8R429                        | Sarcoplasmic/endoplasmic reticulum calcium ATPase 1 | 1310       | 1.07                     |
| Q9WUB3                        | Glycogen phosphorylase_ muscle form                 | 4719       | 0.98                     |
| P58771                        | Tropomyosin alpha-1 chain                           | 10907      | 0.90                     |

|        |                                                          |       |      |
|--------|----------------------------------------------------------|-------|------|
| P52480 | Pyruvate kinase                                          | 9371  | 0.84 |
| P21107 | Tropomyosin alpha-3 chain                                | 526   | 0.81 |
| P07310 | Creatine kinase M-type                                   | 20796 | 0.80 |
| Q3TJD7 | PDZ and LIM domain protein 7                             | 1073  | 0.80 |
| P13412 | Troponin I_ fast skeletal muscle                         | 1865  | 0.80 |
| Q7TQ48 | Sarcalumenin                                             | 57    | 0.79 |
| P05202 | Aspartate aminotransferase_ mitochondrial                | 238   | 0.79 |
| P97457 | Myosin regulatory light chain 2_ skeletal muscle isoform | 7565  | 0.77 |
| Q99KI0 | Aconitate hydratase_ mitochondrial                       | 170   | 0.76 |
| P47857 | ATP-dependent 6-phosphofructokinase_ muscle type         | 551   | 0.76 |
| A2AQP0 | Myosin-7B                                                | 1899  | 0.76 |
| Q8VDD5 | Myosin-9                                                 | 314   | 0.76 |
| Q9R0Y5 | Adenylate kinase isoenzyme 1                             | 6335  | 0.76 |
| Q62234 | Myomesin-1                                               | 185   | 0.76 |
| Q6URW6 | Myosin-14                                                | 309   | 0.76 |
| Q9QZ47 | Troponin T_ fast skeletal muscle                         | 1883  | 0.76 |
| O09165 | Calsequestrin-1                                          | 1739  | 0.75 |
| O08638 | Myosin-11                                                | 319   | 0.75 |
| P60710 | Actin_ cytoplasmic 1                                     | 78650 | 0.74 |
| P63260 | Actin_ cytoplasmic 2                                     | 78650 | 0.74 |
| Q61879 | Myosin-10                                                | 309   | 0.74 |
| Q5XKE0 | Myosin-binding protein C_ fast-type                      | 2080  | 0.74 |
| Q5SX39 | Myosin-4                                                 | 19417 | 0.73 |
| Q03265 | ATP synthase subunit alpha_ mitochondrial                | 667   | 0.73 |
| P31001 | Desmin                                                   | 117   | 0.73 |
| P14152 | Malate dehydrogenase_ cytoplasmic                        | 409   | 0.73 |
| P08249 | Malate dehydrogenase_ mitochondrial O                    | 1446  | 0.73 |
| Q9D0F9 | Phosphoglucomutase-1                                     | 201   | 0.73 |
| P58774 | Tropomyosin beta chain                                   | 7827  | 0.72 |
| Q02566 | Myosin-6                                                 | 5984  | 0.71 |
| P13542 | Myosin-8                                                 | 11378 | 0.71 |
| P15532 | Nucleoside diphosphate kinase A                          | 281   | 0.71 |
| P57780 | Alpha-actinin-4                                          | 178   | 0.70 |
| Q5SX40 | Myosin-1                                                 | 14904 | 0.70 |
| Q91Z83 | Myosin-7                                                 | 7429  | 0.70 |
| P07724 | Serum albumin                                            | 1403  | 0.70 |
| P17182 | Alpha-enolase                                            | 4627  | 0.69 |
| Q9JKS4 | LIM domain-binding protein 3                             | 850   | 0.69 |
| Q60605 | Myosin light polypeptide 6                               | 4175  | 0.69 |
| P09041 | Phosphoglycerate kinase 2                                | 639   | 0.69 |
| P09542 | Myosin light chain 3                                     | 9702  | 0.68 |
| Q64518 | Sarcoplasmic/endoplasmic reticulum calcium ATPase 3      | 130   | 0.68 |
| P13541 | Myosin-3                                                 | 4714  | 0.68 |
| P05201 | Aspartate aminotransferase_ cytoplasmic                  | 85    | 0.67 |
| P16015 | Carbonic anhydrase 3                                     | 2095  | 0.67 |
| P06151 | L-lactate dehydrogenase A chain                          | 2596  | 0.67 |
| P20801 | Troponin C_ skeletal muscle                              | 1409  | 0.67 |
| Q6P8J7 | Creatine kinase S-type_ mitochondrial                    | 389   | 0.66 |
| P09411 | Phosphoglycerate kinase 1                                | 686   | 0.66 |

|        |                                                                 |        |      |
|--------|-----------------------------------------------------------------|--------|------|
| O88990 | Alpha-actinin-3                                                 | 2430   | 0.65 |
| P00342 | L-lactate dehydrogenase C chain                                 | 1187   | 0.65 |
| Q9JI91 | Alpha-actinin-2                                                 | 1054   | 0.63 |
| Q7TPR4 | Alpha-actinin-1                                                 | 193    | 0.63 |
| P56480 | ATP synthase subunit beta_ mitochondrial                        | 1129   | 0.63 |
| P0DP26 | Calmodulin-1                                                    | 502    | 0.63 |
| O70250 | Phosphoglycerate mutase 2                                       | 1961   | 0.63 |
| P0DP28 | Calmodulin-3                                                    | 502    | 0.62 |
| P21550 | Beta-enolase                                                    | 9402   | 0.61 |
| P0DP27 | Calmodulin-2                                                    | 502    | 0.61 |
| P17183 | Gamma-enolase                                                   | 444    | 0.61 |
| P05064 | Fructose-bisphosphate aldolase A                                | 18392  | 0.61 |
| P17751 | Triosephosphate isomerase                                       | 6732   | 0.61 |
| P16125 | L-lactate dehydrogenase B chain                                 | 353    | 0.60 |
| Q64478 | Histone H2B type 1-H                                            | 890    | 0.59 |
| P68134 | Actin_ alpha skeletal muscle                                    | 111877 | 0.59 |
| P10126 | Elongation factor 1-alpha 1                                     | 108    | 0.59 |
| P04247 | Myoglobin                                                       | 304    | 0.59 |
| Q8BFZ3 | Beta-actin-like protein 2                                       | 26045  | 0.58 |
| Q64475 | Histone H2B type 1-B                                            | 890    | 0.58 |
| P10853 | Histone H2B type 1-F/J/L                                        | 890    | 0.58 |
| Q64525 | Histone H2B type 2-B                                            | 890    | 0.58 |
| Q9QXS1 | Plectin                                                         | 100    | 0.58 |
| Q6ZWY9 | Histone H2B type 1-C/E/G                                        | 890    | 0.58 |
| Q8CGP1 | Histone H2B type 1-K                                            | 890    | 0.58 |
| P68033 | Actin_ alpha cardiac muscle 1                                   | 106303 | 0.57 |
| P05063 | Fructose-bisphosphate aldolase C                                | 1869   | 0.57 |
| P70696 | Histone H2B type 1-A                                            | 708    | 0.57 |
| Q9D2U9 | Histone H2B type 3-A                                            | 890    | 0.57 |
| Q8CGP0 | Histone H2B type 3-B                                            | 890    | 0.57 |
| Q9JK37 | Myozenin-1                                                      | 466    | 0.57 |
| P63268 | Actin_ gamma-enteric smooth muscle                              | 102366 | 0.57 |
| P62631 | Elongation factor 1-alpha 2                                     | 417    | 0.57 |
| Q8CGP2 | Histone H2B type 1-P                                            | 890    | 0.57 |
| P62737 | Actin_ aortic smooth muscle                                     | 102579 | 0.56 |
| Q64524 | Histone H2B type 2-E                                            | 890    | 0.55 |
| P09541 | Myosin light chain 4                                            | 6543   | 0.55 |
| P10854 | Histone H2B type 1-M                                            | 890    | 0.54 |
| Q9JIF9 | Myotilin                                                        | 216    | 0.52 |
| Q9D051 | Pyruvate dehydrogenase E1 component subunit beta_ mitochondrial | 88     | 0.51 |
| Q3UU96 | Serine/threonine-protein kinase MRCK alpha                      | 128    | 0.50 |
| P05977 | Myosin light chain 1/3 skeletal muscle isoform                  | 33434  | 0.50 |
| P16858 | Glyceraldehyde-3-phosphate dehydrogenase                        | 25084  | 0.48 |
| P01942 | Hemoglobin subunit alpha                                        | 10325  | 0.45 |
| P02104 | Hemoglobin subunit epsilon-Y2                                   | 2425   | 0.44 |
| Q99PT9 | Kinesin-like protein KIF19                                      | 181    | 0.41 |
| P02088 | Hemoglobin subunit beta-1                                       | 3958   | 0.41 |
| Q8CB87 | Ras-related protein Rab-44                                      | 115    | 0.37 |
| P99024 | Tubulin beta-5 chain                                            | 222    | 0.34 |

|        |                                                      |      |      |
|--------|------------------------------------------------------|------|------|
| Q9D6F9 | Tubulin beta-4A chain                                | 1641 | 0.32 |
| Q9WVP9 | Interferon-induced GTP-binding protein Mx2           | 298  | 0.32 |
| P68372 | Tubulin beta-4B chain                                | 161  | 0.31 |
| Q7TMM9 | Tubulin beta-2A chain                                | 222  | 0.31 |
| Q9CWF2 | Tubulin beta-2B chain                                | 222  | 0.31 |
| Q3U435 | Matrix metalloproteinase-25                          | 93   | 0.30 |
| P09922 | Interferon-induced GTP-binding protein Mx1           | 327  | 0.30 |
| Q61503 | 5'-nucleotidase                                      | 105  | 0.29 |
| P32848 | Parvalbumin alpha                                    | 7739 | 0.28 |
| Q8VHX6 | Filamin-C                                            | 118  | 0.23 |
| Q3UVV9 | von Willebrand factor A domain-containing protein 3A | 118  | 0.12 |
| Q8VI93 | 2'-5'-oligoadenylate synthase 3                      | 51   | SI*  |
| P20029 | 78 kDa glucose-regulated protein                     | 46   | SI   |
| Q5SWU9 | Acetyl-CoA carboxylase 1                             | 123  | SI   |
| Q9QY83 | Actin-like protein 7B                                | 95   | SI   |
| P03958 | Adenosine deaminase                                  | 71   | SI   |
| Q8C0T9 | Adenylate cyclase type 10                            | 30   | SI   |
| P46660 | Alpha-internexin                                     | 72   | SI   |
| G3UZ78 | Androglobin                                          | 97   | SI   |
| Q9WV74 | Ankyrin repeat and SOCS box protein 1                | 243  | SI   |
| O88512 | AP-1 complex subunit gamma-like 2                    | 58   | SI   |
| P12382 | ATP-dependent 6-phosphofructokinase liver type       | 77   | SI   |
| Q9WUA3 | ATP-dependent 6-phosphofructokinase_ platelet type   | 85   | SI   |
| Q8C0J2 | Autophagy-related protein 16-1                       | 46   | SI   |
| O70318 | Band 4.1-like protein 2                              | 31   | SI   |
| P21855 | B-cell differentiation antigen CD72                  | 88   | SI   |
| Q91Z96 | BMP-2-inducible protein kinase                       | 100  | SI   |
| Q8VHF2 | Cadherin-related family member 5                     | 31   | SI   |
| Q80V31 | Centrosomal protein of 104 kDa                       | 237  | SI   |
| Q8C6E0 | Cilia- and flagella-associated protein 36            | 171  | SI   |
| Q9D180 | Cilia- and flagella-associated protein 57            | 51   | SI   |
| E9Q1U1 | Coiled-coil domain-containing protein 171            | 74   | SI   |
| P11087 | Collagen alpha-1(I) chain                            | 70   | SI   |
| P02463 | Collagen alpha-1(IV) chain                           | 96   | SI   |
| Q07643 | Collagen alpha-2(IX) chain                           | 63   | SI   |
| Q04447 | Creatine kinase B-type                               | 52   | SI   |
| O88874 | Cyclin-K                                             | 91   | SI   |
| P00405 | Cytochrome c oxidase subunit 2                       | 97   | SI   |
| P43023 | Cytochrome c oxidase subunit 6A2_ mitochondrial      | 1471 | SI   |
| Q8R1A4 | Dedicator of cytokinesis protein 7                   | 109  | SI   |
| A2RSQ0 | DENN domain-containing protein 5B                    | 79   | SI   |
| O08749 | Dihydrolipoyl dehydrogenase_ mitochondrial           | 81   | SI   |
| Q9EQF6 | Dihydropyrimidinase-related protein 5                | 120  | SI   |
| Q9DA79 | Dipeptidase 3                                        | 80   | SI   |
| Q811D0 | Disks large homolog 1                                | 63   | SI   |
| P22682 | E3 ubiquitin-protein ligase CBL                      | 60   | SI   |
| Q4U2R1 | E3 ubiquitin-protein ligase HERC2                    | 226  | SI   |
| Q8R0K2 | E3 ubiquitin-protein ligase TRIM31                   | 58   | SI   |
| Q99MI1 | ELKS/Rab6-interacting/CAST family member1            | 65   | SI   |

|        |                                                                             |     |    |
|--------|-----------------------------------------------------------------------------|-----|----|
| Q62420 | Endophilin-A1                                                               | 71  | SI |
| Q62419 | Endophilin-A2                                                               | 71  | SI |
| P48299 | Endothelin-3                                                                | 139 | SI |
| Q9ERK4 | Exportin-2                                                                  | 93  | SI |
| Q5RJI4 | Extracellular tyrosine-protein kinase PKDCC                                 | 290 | SI |
| A3KGK3 | Fer-1-like protein 4                                                        | 107 | SI |
| Q9JJN1 | Fibroblast growth factor 21                                                 | 137 | SI |
| Q8BY35 | FYVE_RhoGEF and PH domain-containing protein 2                              | 55  | SI |
| Q9DBA9 | General transcription factor IIH subunit 1                                  | 82  | SI |
| Q00612 | Glucose-6-phosphate 1-dehydrogenase X                                       | 95  | SI |
| Q9WU65 | Glycerol kinase 2                                                           | 53  | SI |
| Q9JLM9 | Growth factor receptor-bound protein 14                                     | 120 | SI |
| Q9ERL9 | Guanylate cyclase soluble subunit alpha-3                                   | 67  | SI |
| P79457 | Histone demethylase UTY                                                     | 42  | SI |
| Q9Z148 | Histone-lysine N-methyltransferase EHMT2                                    | 84  | SI |
| Q63ZW7 | InaD-like protein                                                           | 41  | SI |
| Q8CIM8 | Integrator complex subunit 4                                                | 86  | SI |
| A2ARA8 | Integrin alpha-8                                                            | 46  | SI |
| Q80U22 | Iporin                                                                      | 131 | SI |
| Q69ZK5 | Kelch-like protein 14                                                       | 91  | SI |
| Q9D312 | Keratin_ type I cytoskeletal 20                                             | 60  | SI |
| L0N7N1 | Kinesin-like protein KIF14                                                  | 105 | SI |
| Q99PW8 | Kinesin-like protein KIF17                                                  | 51  | SI |
| Q80WE4 | Kinesin-like protein KIF20B                                                 | 49  | SI |
| E9Q5G3 | Kinesin-like protein KIF23                                                  | 47  | SI |
| Q9D3W5 | Leucine-rich repeat-containing protein 71                                   | 122 | SI |
| Q8CBY3 | Leukocyte receptor cluster member 8 homolog                                 | 69  | SI |
| Q148V7 | LisH domain and HEAT repeat-containing protein KIAA1468                     | 103 | SI |
| Q61790 | Lymphocyte activation gene 3 protein                                        | 90  | SI |
| Q8CDB0 | MAP kinase-interacting serine/threonine- protein kinase 2                   | 147 | SI |
| Q8VCD5 | Mediator of RNA polymerase II transcription subunit 17                      | 68  | SI |
| O35954 | Membrane-associated phosphatidylinositol transfer protein 1                 | 86  | SI |
| Q3TPJ7 | Midnolin                                                                    | 89  | SI |
| Q99MT2 | MutS protein homolog 4                                                      | 76  | SI |
| Q80YT7 | Myomegalin                                                                  | 78  | SI |
| Q3UIZ8 | Myosin light chain kinase 3                                                 | 138 | SI |
| Q91XS1 | Myotubularin-related protein 4                                              | 153 | SI |
| Q8R4E4 | Myozenin-3                                                                  | 277 | SI |
| Q66X22 | NACHT_LRR and PYD domains-containing protein 9B                             | 120 | SI |
| Q99LC3 | NADH dehydrogenase [ubiquinone] 1 alpha subcomplex subunit 10_mitochondrial | 149 | SI |
| Q91YT0 | NADH dehydrogenase [ubiquinone] flavoprotein 1_ mitochondrial               | 76  | SI |
| Q91WD5 | NADH dehydrogenase [ubiquinone] iron- sulfur protein 2_ mitochondrial       | 89  | SI |
| E9Q7X7 | Neurexin II                                                                 | 64  | SI |
| Q6ZQ12 | Ninein-like protein                                                         | 58  | SI |
| Q69ZF3 | Non-lysosomal glucosylceramidase                                            | 66  | SI |
| Q99ML2 | Non-receptor tyrosine-protein kinase TNK1                                   | 50  | SI |
| Q9WU42 | Nuclear receptor corepressor 2                                              | 25  | SI |
| P41593 | Parathyroid hormone/parathyroid hormone- related peptide receptor           | 65  | SI |

|        |                                                                     |     |    |
|--------|---------------------------------------------------------------------|-----|----|
| Q8CEE6 | PAS domain-containing serine/threonine- protein kinase              | 63  | SI |
| P15331 | Peripherin                                                          | 83  | SI |
| Q78Y63 | Phosducin-like protein 2                                            | 95  | SI |
| Q9DBJ1 | Phosphoglycerate mutase 1                                           | 30  | SI |
| Q3UH93 | Plexin-D1                                                           | 149 | SI |
| Q62083 | PRKCA-binding protein                                               | 81  | SI |
| P54823 | Probable ATP-dependent RNA helicase DDX6                            | 67  | SI |
| Q8CDU6 | Probable E3 ubiquitin-protein ligase HECTD2                         | 359 | SI |
| Q8VDC0 | Probable leucine--tRNA ligase_ mitochondrial                        | 93  | SI |
| Q9QUM9 | Proteasome subunit alpha type-6                                     | 86  | SI |
| O70279 | Protein DGCR14                                                      | 68  | SI |
| Q9D4K5 | Protein FAM166A                                                     | 58  | SI |
| Q2VWQ2 | Protein kinase C-binding protein NELL1                              | 117 | SI |
| B1AUR6 | Protein MMS22-like                                                  | 162 | SI |
| Q8K2C7 | Protein OS-9                                                        | 76  | SI |
| P97352 | Protein S100-A13                                                    | 135 | SI |
| Q80TF3 | Protocadherin-19                                                    | 48  | SI |
| Q60695 | Ral guanine nucleotide dissociation stimulator- like 1              | 65  | SI |
| Q91YQ1 | Ras-related protein Rab-7L1                                         | 92  | SI |
| A2AQ19 | RNA polymerase-associated protein RTF1 homolog                      | 64  | SI |
| Q60806 | Serine/threonine-protein kinase PLK3                                | 77  | SI |
| Q8BKX6 | Serine/threonine-protein kinase SMG1                                | 100 | SI |
| Q9Z2E3 | Serine/threonine-protein kinase/endoribonuclease IRE2               | 64  | SI |
| Q9JID9 | SH2B adapter protein 2                                              | 218 | SI |
| Q8BJA2 | Solute carrier family 41 member 1                                   | 134 | SI |
| Q3UTJ2 | Sorbin and SH3 domain-containing protein 2                          | 136 | SI |
| Q8BI29 | Specifically androgen-regulated gene protein                        | 170 | SI |
| Q7TME2 | Sperm-associated antigen 5                                          | 51  | SI |
| Q5U4C3 | Splicing factor_ arginine/serine-rich 19                            | 208 | SI |
| Q9QWI6 | SRC kinase signaling inhibitor 1                                    | 41  | SI |
| Q91YE8 | Synaptopodin-2                                                      | 152 | SI |
| P70327 | T-box transcription factor TBX6                                     | 72  | SI |
| A3KMP2 | Tetratricopeptide repeat protein 38                                 | 69  | SI |
| Q715T0 | Thioredoxin domain-containing protein 3                             | 136 | SI |
| Q8K424 | Transient receptor potential cation channel subfamily V member 3    | 59  | SI |
| Q8BGN6 | Transmembrane gamma-carboxyglutamic acid protein 4                  | 124 | SI |
| Q922K9 | Tyrosine-protein kinase FRK                                         | 61  | SI |
| Q9D0L4 | Uncharacterized aarF domain-containing protein kinase 1             | 86  | SI |
| Q3TEI4 | Uncharacterized protein C15orf39 homolog                            | 120 | SI |
| Q3TLD5 | Unconventional prefoldin RPB5 interactor                            | 81  | SI |
| Q91ZJ5 | UTP--glucose-1-phosphate uridylyltransferase                        | 73  | SI |
| Q5KU39 | Vacuolar protein sorting-associated protein 41 homolog              | 49  | SI |
| P29533 | Vascular cell adhesion protein 1                                    | 84  | SI |
| Q8VDJ3 | Vigilin                                                             | 383 | SI |
| Q60932 | Voltage-dependent anion-selective channel protein 1                 | 291 | SI |
| Q3U5F4 | YrdC domain-containing protein_ mitochondrial                       | 103 | SI |
| Q5F293 | Zinc finger and BTB domain-containing protein 4                     | 71  | SI |
| Q9JJN2 | Zinc finger homeobox protein 4                                      | 199 | SI |
| Q9JLM4 | Zinc finger MYM-type protein 3                                      | 76  | SI |
| Q8CJ19 | [F-actin]-methionine sulfoxide oxidase MICAL3                       | 80  | RI |
| Q8K4S1 | 1-phosphatidylinositol 4_5-bisphosphate phosphodiesterase epsilon-1 | 225 | RI |
| Q9EQC1 | 3 beta-hydroxysteroid dehydrogenase type 7                          | 491 | RI |



|        |                                                             |     |    |
|--------|-------------------------------------------------------------|-----|----|
| P97819 | 85/88 kDa calcium-independent phospholipase A2              | 373 | RI |
| Q8QZT1 | Acetyl-CoA acetyltransferase_ mitochondrial                 | 146 | RI |
| Q80WC9 | Acyl-CoA synthetase family member 4                         | 55  | RI |
| P48962 | ADP/ATP translocase 1                                       | 48  | RI |
| P51881 | ADP/ATP translocase 2                                       | 48  | RI |
| Q3V132 | ADP/ATP translocase 4                                       | 50  | RI |
| P07758 | Alpha-1-antitrypsin 1-1                                     | 132 | RI |
| P22599 | Alpha-1-antitrypsin 1-2                                     | 132 | RI |
| Q00896 | Alpha-1-antitrypsin 1-3                                     | 132 | RI |
| Q00897 | Alpha-1-antitrypsin 1-4                                     | 132 | RI |
| Q9QYC0 | Alpha-adducin                                               | 130 | RI |
| Q8CFA2 | Aminomethyltransferase_ mitochondrial                       | 140 | RI |
| Q80VM7 | Ankyrin repeat domain-containing protein 24                 | 250 | RI |
| Q3UMR0 | Ankyrin repeat domain-containing protein 27                 | 212 | RI |
| Q8C8R3 | Ankyrin-2                                                   | 131 | RI |
| P14824 | Annexin A6                                                  | 111 | RI |
| Q9JKC8 | AP-3 complex subunit mu-1                                   | 76  | RI |
| Q80V94 | AP-4 complex subunit epsilon-1                              | 38  | RI |
| Q5YD48 | APOBEC1 complementation factor                              | 92  | RI |
| Q9Z2A5 | Arginyl-tRNA--protein transferase 1                         | 113 | RI |
| Q8R4I1 | Ataxin-7                                                    | 99  | RI |
| Q9CQQ7 | ATP synthase F(0) complex subunit B1_ mitochondrial         | 193 | RI |
| Q8VDW0 | ATP-dependent RNA helicase DDX39A                           | 161 | RI |
| Q60936 | Atypical kinase COQ8A_ mitochondrial                        | 211 | RI |
| P52963 | Band 4.1-like protein 4A                                    | 100 | RI |
| P48754 | Breast cancer type 1 susceptibility protein homolog         | 160 | RI |
| Q9WV35 | C->U-editing enzyme APOBEC-2                                | 386 | RI |
| Q9WTR5 | Cadherin-13                                                 | 77  | RI |
| Q6Q473 | Calcium-activated chloride channel regulator4A              | 84  | RI |
| Q9D6P8 | Calmodulin-like protein 3                                   | 117 | RI |
| Q3UKK2 | Carcinoembryonic antigen-related cell adhesion molecule 5   | 54  | RI |
| Q61301 | Catenin alpha-2                                             | 67  | RI |
| O54724 | Caveolae-associated protein 1                               | 127 | RI |
| Q14B71 | Cell division cycle-associated protein 2                    | 464 | RI |
| Q6P8Y0 | Cilia- and flagella-associated protein 161                  | 101 | RI |
| Q9CZU6 | Citrate synthase_ mitochondrial                             | 121 | RI |
| P49025 | Citron Rho-interacting kinase                               | 510 | RI |
| Q68FD5 | Clathrin heavy chain 1                                      | 91  | RI |
| O35218 | Cleavage and polyadenylation specificity factor subunit 2   | 81  | RI |
| Q640L5 | Coiled-coil domain-containing protein 18                    | 63  | RI |
| Q6NS45 | Coiled-coil domain-containing protein 66                    | 107 | RI |
| Q504P2 | C-type lectin domain family 12 member A                     | 115 | RI |
| Q99KY4 | Cyclin-G-associated kinase                                  | 199 | RI |
| P12787 | Cytochrome c oxidase subunit 5A_ mitochondrial              | 539 | RI |
| P62897 | Cytochrome c_somatic                                        | 412 | RI |
| Q570Y9 | DEP domain-containing mTOR-interacting protein              | 133 | RI |
| Q8CDG3 | Deubiquitinating protein VCIP135                            | 57  | RI |
| P70175 | Disks large homolog 3                                       | 122 | RI |
| Q8R4E9 | DNA replication factor Cdt1                                 | 132 | RI |
| Q99LC5 | Electron transfer flavoprotein subunit alpha_ mitochondrial | 122 | RI |
| P58252 | Elongation factor 2                                         | 125 | RI |
| Q8K203 | Endonuclease 8-like 3                                       | 161 | RI |
| P42567 | Epidermal growth factor receptor substrate 15               | 58  | RI |

|        |                                                                      |     |    |
|--------|----------------------------------------------------------------------|-----|----|
| Q8C7X2 | ER membrane protein complex subunit 1                                | 77  | RI |
| P47753 | F-actin-capping protein subunit alpha-1                              | 90  | RI |
| P47754 | F-actin-capping protein subunit alpha-2                              | 289 | RI |
| P50608 | Fibromodulin                                                         | 68  | RI |
| Q80TD3 | Folliculin-interacting protein 2                                     | 39  | RI |
| Q99JB6 | Forkhead box protein P3                                              | 70  | RI |
| Q8VDC1 | FYVE and coiled-coil domain-containing protein 1                     | 72  | RI |
| Q60928 | Gamma-glutamyltranspeptidase 1                                       | 219 | RI |
| Q9ESZ8 | General transcription factor II-I                                    | 141 | RI |
| Q99NI3 | General transcription factor II-I repeat domain-containing protein 2 | 182 | RI |
| Q9CQI3 | Glia maturation factor beta                                          | 283 | RI |
| Q64467 | Glyceraldehyde-3-phosphate dehydrogenase_ testis-specific            | 108 | RI |
| Q8BKV1 | Glypican-2                                                           | 69  | RI |
| Q60780 | Growth arrest-specific protein 7                                     | 110 | RI |
| Q60779 | Growth arrest-specific protein 8                                     | 52  | RI |
| P11499 | Heat shock protein HSP 90-beta                                       | 105 | RI |
| Q99NG0 | Helicase ARIP4                                                       | 77  | RI |
| A2AJ76 | Hemicentin-2                                                         | 204 | RI |
| Q8BRB7 | Histone acetyltransferase KAT6B                                      | 193 | RI |
| P97443 | Histone-lysine N-methyltransferase Smyd1                             | 79  | RI |
| Q9WUI0 | Homeobox protein MIXL1                                               | 152 | RI |
| P01586 | Interleukin-3                                                        | 140 | RI |
| P54071 | Isocitrate dehydrogenase [NADP]_ mitochondrial O                     | 166 | RI |
| Q49714 | Keratin_ type I cuticular Ha5                                        | 139 | RI |
| Q61595 | Kinectin                                                             | 135 | RI |
| Q9QXL1 | Kinesin-like protein KIF21B                                          | 77  | RI |
| O89112 | LanC-like protein 1                                                  | 101 | RI |
| Q8CGA3 | Large neutral amino acids transporter small subunit 4                | 92  | RI |
| Q8C129 | Leucyl-cystinyl aminopeptidase                                       | 88  | RI |
| Q9DBN5 | Lon protease homolog 2_peroxisomal                                   | 80  | RI |
| P34884 | Macrophage migration inhibitory factor                               | 163 | RI |
| Q9WV34 | MAGUK p55 subfamily member 2                                         | 165 | RI |
| Q924M7 | Mannose-6-phosphate isomerase                                        | 111 | RI |
| Q9JI70 | McKusick-Kaufman/Bardet-Biedl syndromes putative chaperonin          | 99  | RI |
| Q5F2C3 | Meiosis-specific kinetochore protein                                 | 87  | RI |
| B1AYB6 | Methyl-CpG-binding domain protein 5                                  | 114 | RI |
| Q9DCS2 | Methyltransferase-like 26                                            | 319 | RI |
| Q8CAQ8 | MICOS complex subunit Mic60                                          | 244 | RI |
| Q8C052 | Microtubule-associated protein 1S                                    | 82  | RI |
| Q9WTX8 | Mitotic spindle assembly checkpoint protein MAD1                     | 51  | RI |
| P30306 | M-phase inducer phosphatase 2                                        | 109 | RI |
| P23949 | mRNA decay activator protein ZFP36L2                                 | 65  | RI |
| O08539 | Myc box-dependent-interacting protein 1                              | 200 | RI |
| Q3UIJ9 | Myocardial zonula adherens protein                                   | 48  | RI |
| Q8CI43 | Myosin light chain 6B                                                | 175 | RI |
| P70402 | Myosin-binding protein H                                             | 207 | RI |
| Q923E4 | NAD-dependent protein deacetylase sirtuin-1                          | 170 | RI |
| Q8BMT4 | Negative regulator of reactive oxygen species                        | 382 | RI |
| P70232 | Neural cell adhesion molecule L1-like protein                        | 174 | RI |
| Q99PJ0 | Neurotrimin                                                          | 122 | RI |
| P70255 | Nuclear factor 1 C-type                                              | 196 | RI |
| P25799 | Nuclear factor NF-kappa-B p105 subunit                               | 172 | RI |
| Q99MH5 | Nucleoside diphosphate kinase homolog 5                              | 235 | RI |

|        |                                                                              |      |    |
|--------|------------------------------------------------------------------------------|------|----|
| O70209 | PDZ and LIM domain protein 3                                                 | 103  | RI |
| P17742 | Peptidyl-prolyl cis-trans isomerase A                                        | 501  | RI |
| P30416 | Peptidyl-prolyl cis-trans isomerase FKBP4                                    | 75   | RI |
| P48725 | Pericentrin                                                                  | 138  | RI |
| Q62009 | Periostin                                                                    | 90   | RI |
| P16331 | Phenylalanine-4-hydroxylase                                                  | 131  | RI |
| Q69ZK0 | Phosphatidylinositol 3_4_5-trisphosphate- dependent Rac exchanger 1 protein  | 44   | RI |
| Q61194 | Phosphatidylinositol 4-phosphate 3-kinase C2 domain-containing subunit alpha | 49   | RI |
| P70181 | Phosphatidylinositol 4-phosphate 5-kinase type-1 beta                        | 64   | RI |
| Q9Z280 | Phospholipase D1                                                             | 151  | RI |
| B2RPU2 | Pleckstrin homology domain-containing family D member 1                      | 87   | RI |
| P01193 | Pro-opiomelanocortin                                                         | 84   | RI |
| Q8C569 | Protein FAM118B                                                              | 197  | RI |
| Q148A4 | Protein phosphatase 1 regulatory subunit 32                                  | 156  | RI |
| Q9Z1N9 | Protein unc-13 homolog B                                                     | 87   | RI |
| O55134 | Protocadherin-12                                                             | 196  | RI |
| Q7TSK3 | Protocadherin-8                                                              | 68   | RI |
| P06240 | Proto-oncogene tyrosine-protein kinase LCK                                   | 1024 | RI |
| Q8BRM2 | RAB6-interacting golgin                                                      | 184  | RI |
| P59729 | Ras and Rab interactor 3                                                     | 129  | RI |
| Q8CGE9 | Regulator of G-protein signaling 12                                          | 59   | RI |
| Q9DC04 | Regulator of G-protein signaling 3                                           | 91   | RI |
| P00796 | Renin-2                                                                      | 110  | RI |
| Q811M1 | Rho GTPase-activating protein 15                                             | 83   | RI |
| Q9CWR0 | Rho guanine nucleotide exchange factor 25                                    | 129  | RI |
| O35130 | Ribosomal RNA small subunit methyltransferase NEP1                           | 228  | RI |
| Q4VGL6 | Roquin-1                                                                     | 143  | RI |
| E9PZQ0 | Ryanodine receptor 1                                                         | 131  | RI |
| Q60988 | SCL-interrupting locus protein homolog                                       | 104  | RI |
| Q64105 | Sepiapterin reductase                                                        | 148  | RI |
| Q9JIY5 | Serine protease HTRA2_ mitochondrial                                         | 191  | RI |
| Q7TSI3 | Serine/threonine-protein phosphatase 6 regulatory subunit 1                  | 141  | RI |
| Q8BTK5 | SET and MYND domain-containing protein 4                                     | 64   | RI |
| Q4ACU6 | SH3 and multiple ankyrin repeat domains protein 3                            | 163  | RI |
| P98083 | SHC-transforming protein 1                                                   | 71   | RI |
| Q8VDU5 | SNF-related serine/threonine-protein kinase                                  | 57   | RI |
| Q9D2S4 | Sperm acrosome-associated protein 7                                          | 218  | RI |
| Q80ZX8 | Sperm-associated antigen 1                                                   | 93   | RI |
| Q9Z1N5 | Spliceosome RNA helicase Ddx39b                                              | 81   | RI |
| P97496 | SWI/SNF complex subunit SMARCC1                                              | 96   | RI |
| Q8BWB1 | Synaptopodin 2-like protein                                                  | 170  | RI |
| Q8K1E0 | Syntaxin-5                                                                   | 496  | RI |
| P26039 | Talin-1                                                                      | 147  | RI |
| Q8CGA2 | TBC1 domain family member 14                                                 | 168  | RI |
| Q6X6Z7 | Tektin-3                                                                     | 78   | RI |
| O70548 | Telethonin                                                                   | 132  | RI |
| Q9JMH6 | Thioredoxin reductase 1_ cytoplasmic                                         | 114  | RI |
| Q9JLT4 | Thioredoxin reductase 2_ mitochondrial                                       | 234  | RI |
| P63058 | Thyroid hormone receptor alpha                                               | 137  | RI |
| Q60610 | T-lymphoma invasion and metastasis-inducing protein 1                        | 57   | RI |
| Q8BHE4 | Transmembrane protein 108                                                    | 70   | RI |

|        |                                                       |     |    |
|--------|-------------------------------------------------------|-----|----|
| O70472 | Transmembrane protein 131                             | 134 | RI |
| Q64514 | Tripeptidyl-peptidase 2                               | 96  | RI |
| Q9WUZ5 | Troponin I_ slow skeletal muscle                      | 233 | RI |
| Q9ERD7 | Tubulin beta-3 chain                                  | 228 | RI |
| Q922F4 | Tubulin beta-6 chain                                  | 157 | RI |
| A4Q9F4 | Tubulin polyglutamylase TTLL11                        | 103 | RI |
| Q8BX43 | Tumor necrosis factor receptor superfamily member 19L | 147 | RI |
| Q9Z315 | U4/U6.U5 tri-snRNP-associated protein 1               | 79  | RI |
| P56399 | Ubiquitin carboxyl-terminal hydrolase 5               | 119 | RI |
| Q8CB27 | Ubiquitin thioesterase OTU1                           | 137 | RI |
| P68037 | Ubiquitin-conjugating enzyme E2 L3                    | 79  | RI |
| Q3UTZ3 | Uncharacterized protein C7orf43 homolog               | 87  | RI |
| A9Z1V5 | von Willebrand factor A domain-containing protein 5B1 | 171 | RI |
| Q6PDJ1 | VWFA and cache domain-containing protein 1            | 53  | RI |
| Q80VW5 | Whirlin                                               | 184 | RI |
| Q6NZF1 | Zinc finger CCCH domain-containing protein11A         | 107 | RI |
| Q8BYK8 | Zinc finger CCCH domain-containing protein6           | 114 | RI |
| Q9R0G7 | Zinc finger E-box-binding homeobox 2                  | 178 | RI |
| Q8JZL0 | Zinc finger protein 467                               | 222 | RI |
| Q8K083 | Zinc finger protein 536                               | 412 | RI |

<sup>a</sup>Identification is based on proteins ID from UniProt protein database, reviewed only (<http://www.uniprot.org/>).

<sup>b</sup>Proteins with expression significantly altered are organized according to the ratio.

\*Indicates unique proteins in alphabetical order.

**Table S5.** Proteins with expression significantly altered in the gastrocnemius of SII (A/J, water containing 50 ppm F, no-exercise) and RII (129P3/J, water containing 50 ppm F, no-exercise) mice

| <sup>a</sup> <b>Acession number</b> | <b>Protein name</b>                                      | <b>PLGS Score</b> | <sup>b</sup> <b>Ratio SII:RII</b> |
|-------------------------------------|----------------------------------------------------------|-------------------|-----------------------------------|
| P32848                              | Parvalbumin alpha                                        | 1413              | 18.36                             |
| Q64467                              | Glyceraldehyde-3-phosphate dehydrogenase testis-specific | 204               | 6.82                              |
| Q91VW5                              | Golgin subfamily A member 4                              | 84                | 4.06                              |
| P21107                              | Tropomyosin alpha-3 chain                                | 148               | 3.82                              |
| P11404                              | Fatty acid-binding protein_ heart                        | 393               | 3.42                              |
| Q04690                              | Neurofibromin                                            | 60                | 2.61                              |
| P51881                              | ADP/ATP translocase 2                                    | 217               | 2.51                              |
| O09165                              | Calsequestrin-1                                          | 1611              | 2.51                              |
| P62897                              | Cytochrome c_ somatic                                    | 145               | 2.46                              |
| P48962                              | ADP/ATP translocase 1                                    | 257               | 2.39                              |
| A2AQP0                              | Myosin-7B                                                | 1485              | 2.34                              |
| P13412                              | Troponin I_ fast skeletal muscle                         | 2483              | 2.32                              |
| Q3V1D3                              | AMP deaminase 1                                          | 175               | 2.18                              |
| P57780                              | Alpha-actinin-4                                          | 172               | 2.05                              |
| P02104                              | Hemoglobin subunit epsilon-Y2                            | 2086              | 2.05                              |
| Q9QXS1                              | Plectin                                                  | 28                | 1.92                              |
| P02089                              | Hemoglobin subunit beta-2                                | 2086              | 1.90                              |
| P52480                              | Pyruvate kinase PKM                                      | 5611              | 1.88                              |
| O55143                              | Sarcoplasmic/endoplasmic reticulum calcium ATPase 2      | 205               | 1.82                              |
| P12382                              | ATP-dependent 6-phosphofructokinase_liver type           | 68                | 1.77                              |
| O70250                              | Phosphoglycerate mutase 2                                | 1811              | 1.77                              |
| P02088                              | Hemoglobin subunit beta-1                                | 2777              | 1.73                              |
| Q9R0Y5                              | Adenylate kinase isoenzyme 1                             | 7048              | 1.68                              |

|        |                                                          |        |      |
|--------|----------------------------------------------------------|--------|------|
| Q7TQ48 | Sarcalumenin                                             | 60     | 1.68 |
| P0DP28 | Calmodulin-3                                             | 315    | 1.67 |
| Q9JI91 | Alpha-actinin-2                                          | 377    | 1.65 |
| P0DP26 | Calmodulin-1                                             | 315    | 1.65 |
| P17751 | Triosephosphate isomerase                                | 4428   | 1.65 |
| Q7TPR4 | Alpha-actinin-1                                          | 215    | 1.63 |
| P0DP27 | Calmodulin-2                                             | 315    | 1.62 |
| Q3TJD7 | PDZ and LIM domain protein 7                             | 950    | 1.62 |
| P08249 | Malate dehydrogenase_ mitochondrial                      | 756    | 1.60 |
| A2AL36 | Centriolin                                               | 88     | 1.57 |
| P16858 | Glyceraldehyde-3-phosphate dehydrogenase                 | 19243  | 1.57 |
| P07310 | Creatine kinase M-type                                   | 17477  | 1.52 |
| Q8R429 | Sarcoplasmic/endoplasmic reticulum calcium ATPase 1      | 753    | 1.52 |
| P05201 | Aspartate aminotransferase_ cytoplasmic                  | 393    | 1.49 |
| P17183 | Gamma-enolase                                            | 799    | 1.49 |
| Q9CR68 | Cytochrome b-c1 complex subunit Rieske_ mitochondrial    | 86     | 1.48 |
| Q5SSE9 | ATP-binding cassette sub-family A member13               | 128    | 1.46 |
| P14152 | Malate dehydrogenase_ cytoplasmic                        | 150    | 1.46 |
| Q99LX0 | Protein DJ-1                                             | 956    | 1.45 |
| P12787 | Cytochrome c oxidase subunit 5A_ mitochondrial           | 1033   | 1.43 |
| P10126 | Elongation factor 1-alpha 1                              | 82     | 1.43 |
| P06151 | L-lactate dehydrogenase A chain                          | 2878   | 1.43 |
| P47857 | ATP-dependent 6- phosphofructokinase_muscle type         | 444    | 1.39 |
| P31001 | Desmin                                                   | 185    | 1.39 |
| O88990 | Alpha-actinin-3                                          | 1519   | 1.38 |
| Q9D0F9 | Phosphoglucomutase-1                                     | 153    | 1.38 |
| P07724 | Serum albumin                                            | 345    | 1.36 |
| P60710 | Actin_ cytoplasmic 1                                     | 94968  | 1.35 |
| P63260 | Actin_ cytoplasmic 2                                     | 94968  | 1.35 |
| P04247 | Myoglobin                                                | 434    | 1.35 |
| Q01768 | Nucleoside diphosphate kinase B                          | 141    | 1.35 |
| P13542 | Myosin-8                                                 | 10380  | 1.34 |
| P15532 | Nucleoside diphosphate kinase A                          | 141    | 1.34 |
| P58771 | Tropomyosin alpha-1 chain                                | 12103  | 1.34 |
| Q5SX40 | Myosin-1                                                 | 13724  | 1.32 |
| Q99KI0 | Aconitate hydratase_ mitochondrial                       | 145    | 1.31 |
| Q5XKE0 | Myosin-binding protein C_ fast-type                      | 1808   | 1.31 |
| P53657 | Pyruvate kinase PKLR                                     | 698    | 1.31 |
| P05202 | Aspartate aminotransferase_ mitochondrial                | 117    | 1.30 |
| P63017 | Heat shock cognate 71 kDa protein                        | 117    | 1.30 |
| Q62234 | Myomesin-1                                               | 143    | 1.30 |
| P13541 | Myosin-3                                                 | 4303   | 1.30 |
| P09411 | Phosphoglycerate kinase 1                                | 1372   | 1.30 |
| P09041 | Phosphoglycerate kinase 2                                | 992    | 1.30 |
| Q03265 | ATP synthase subunit alpha_ mitochondrial                | 549    | 1.28 |
| P62737 | Actin_ aortic smooth muscle                              | 110654 | 1.26 |
| P63268 | Actin_ gamma-enteric smooth muscle                       | 110480 | 1.26 |
| P56480 | ATP synthase subunit beta_ mitochondrial                 | 791    | 1.26 |
| P16125 | L-lactate dehydrogenase B chain                          | 225    | 1.26 |
| P00342 | L-lactate dehydrogenase C chain                          | 1353   | 1.26 |
| P97457 | Myosin regulatory light chain 2_ skeletal muscle isoform | 13666  | 1.26 |
| P68033 | Actin_ alpha cardiac muscle 1                            | 117501 | 1.25 |
| P68134 | Actin_ alpha skeletal muscle                             | 121903 | 1.25 |

|        |                                                          |       |      |
|--------|----------------------------------------------------------|-------|------|
| P17156 | Heat shock-related 70 kDa protein 2                      | 98    | 1.25 |
| P05064 | Fructose-bisphosphate aldolase A                         | 17992 | 1.23 |
| Q91Z83 | Myosin-7                                                 | 7181  | 1.23 |
| P21550 | Beta-enolase                                             | 6260  | 1.22 |
| Q02566 | Myosin-6                                                 | 5961  | 1.22 |
| P16015 | Carbonic anhydrase 3                                     | 2304  | 1.21 |
| P09542 | Myosin light chain 3                                     | 3753  | 1.21 |
| P20801 | Troponin C_ skeletal muscle                              | 677   | 1.21 |
| P58774 | Tropomyosin beta chain                                   | 6894  | 1.20 |
| Q61879 | Myosin-10                                                | 166   | 1.17 |
| O08638 | Myosin-11                                                | 165   | 1.16 |
| P62631 | Elongation factor 1-alpha 2                              | 208   | 1.15 |
| Q9JKS4 | LIM domain-binding protein 3                             | 690   | 1.15 |
| Q60605 | Myosin light polypeptide 6                               | 1250  | 1.15 |
| Q8VDD5 | Myosin-9                                                 | 165   | 1.14 |
| P17182 | Alpha-enolase                                            | 3491  | 1.13 |
| Q8BFZ3 | Beta-actin-like protein 2                                | 19443 | 1.13 |
| Q6URW6 | Myosin-14                                                | 279   | 1.13 |
| Q9QZ47 | Troponin T_ fast skeletal muscle                         | 1994  | 1.12 |
| P05977 | Myosin light chain 1/3_ skeletal muscle isoform          | 24671 | 1.11 |
| P09541 | Myosin light chain 4                                     | 4125  | 1.11 |
| Q5SX39 | Myosin-4                                                 | 19719 | 1.11 |
| Q9WUB3 | Glycogen phosphorylase_ muscle form                      | 5410  | 1.05 |
| P05063 | Fructose-bisphosphate aldolase C                         | 2425  | 0.87 |
| P42128 | Forkhead box protein K1                                  | 112   | 0.61 |
| Q8CHI8 | E1A-binding protein p400                                 | 77    | 0.34 |
| Q3UH93 | Plexin-D1                                                | 206   | 0.19 |
| Q7TMW6 | Cytosolic Fe-S cluster assembly factor NARFL             | 147   | 0.15 |
| Q810T2 | G2/mitotic-specific cyclin-B3                            | 61    | 0.12 |
| P70327 | T-box transcription factor TBX6                          | 59    | 0.12 |
| Q4KUS2 | Protein unc-13 homolog A                                 | 193   | 0.11 |
| O08810 | 116 kDa U5 small nuclear ribonucleoprotein component     | 394   | SII* |
| P62259 | 14-3-3 protein epsilon                                   | 107   | SII  |
| Q8VCR2 | 17-beta-hydroxysteroid dehydrogenase 13                  | 124   | SII  |
| P20029 | 78 kDa glucose-regulated protein                         | 171   | SII  |
| P54822 | Adenylosuccinate lyase                                   | 90    | SII  |
| G3X982 | Aldehyde oxidase 3                                       | 32    | SII  |
| P53995 | Anaphase-promoting complex subunit 1                     | 68    | SII  |
| Q8BZQ7 | Anaphase-promoting complex subunit 2                     | 63    | SII  |
| Q9D4H4 | Angiomotin-like protein 1                                | 50    | SII  |
| Q9WVH6 | Angiopoietin-4                                           | 154   | SII  |
| Q99NH0 | Ankyrin repeat domain-containing protein 17              | 94    | SII  |
| O88879 | Apoptotic protease-activating factor 1                   | 69    | SII  |
| A2RTL5 | Arginine/serine-rich coiled-coil protein 2               | 344   | SII  |
| Q8BIP0 | Aspartate--tRNA ligase_ mitochondrial                    | 41    | SII  |
| Q4QY64 | ATPase family AAA domain-containing protein 5            | 30    | SII  |
| Q9DC29 | ATP-binding cassette sub-family B member6_ mitochondrial | 69    | SII  |
| Q9WUA3 | ATP-dependent 6-phosphofructokinase_ platelet type       | 33    | SII  |
| O88738 | Baculoviral IAP repeat-containing protein 6              | 80    | SII  |
| P21855 | B-cell differentiation antigen CD72                      | 68    | SII  |
| P41183 | B-cell lymphoma 6 protein homolog                        | 80    | SII  |
| Q6PAL0 | BEN domain-containing protein 3                          | 33    | SII  |
| Q8BWG8 | Beta-arrestin-1                                          | 526   | SII  |

|        |                                                                                                          |      |     |
|--------|----------------------------------------------------------------------------------------------------------|------|-----|
| Q9WV35 | C->U-editing enzyme APOBEC-2                                                                             | 578  | SII |
| B9EHT4 | CAP-Gly domain-containing linker protein 3                                                               | 265  | SII |
| A2A6Q5 | Cell division cycle protein 27 homolog                                                                   | 61   | SII |
| Q6RT24 | Centromere-associated protein E                                                                          | 95   | SII |
| D2J0Y4 | Centrosomal protein C10orf90 homolog                                                                     | 230  | SII |
| Q80TV8 | CLIP-associating protein 1                                                                               | 51   | SII |
| E9Q1U1 | Coiled-coil domain-containing protein 171                                                                | 57   | SII |
| Q6PHN1 | Coiled-coil domain-containing protein 57                                                                 | 60   | SII |
| Q6NS45 | Coiled-coil domain-containing protein 66                                                                 | 66   | SII |
| Q04447 | Creatine kinase B-type                                                                                   | 70   | SII |
| P30275 | Creatine kinase U-type_ mitochondrial                                                                    | 180  | SII |
| Q9DB77 | Cytochrome b-c1 complex subunit 2_ mitochondrial                                                         | 135  | SII |
| Q91YE9 | Cytosolic 5'-nucleotidase 1B                                                                             | 88   | SII |
| Q09M02 | Cytosolic carboxypeptidase-like protein 5                                                                | 142  | SII |
| Q8BIK4 | Dedicator of cytokinesis protein 9                                                                       | 51   | SII |
| A6H8H2 | DENN domain-containing protein 4C                                                                        | 29   | SII |
| Q7TMD7 | Desmoglein-4                                                                                             | 58   | SII |
| O08749 | Dihydrolipoyl dehydrogenase_ mitochondrial                                                               | 39   | SII |
| Q8BMF4 | Dihydrolipoyllysine-residue acetyltransferase component of pyruvate dehydrogenase complex_ mitochondrial | 115  | SII |
| Q9DBT9 | Dimethylglycine dehydrogenase_ mitochondrial                                                             | 65   | SII |
| Q811D0 | Disks large homolog 1                                                                                    | 107  | SII |
| Q91XM9 | Disks large homolog 2                                                                                    | 50   | SII |
| Q9JMC3 | DnaJ homolog subfamily A member 4                                                                        | 166  | SII |
| O70469 | Docking protein 2                                                                                        | 75   | SII |
| Q4U2R1 | E3 ubiquitin-protein ligase HERC2                                                                        | 277  | SII |
| Q8C669 | E3 ubiquitin-protein ligase pellino homolog 1                                                            | 57   | SII |
| A2AN08 | E3 ubiquitin-protein ligase UBR4                                                                         | 72   | SII |
| Q9DCW4 | Electron transfer flavoprotein subunit beta                                                              | 151  | SII |
| Q99MI1 | ELKS/Rab6-interacting/CAST family member1                                                                | 49   | SII |
| P58252 | Elongation factor 2                                                                                      | 430  | SII |
| Q8C0D5 | Elongation factor-like GTPase 1                                                                          | 97   | SII |
| Q9ERK4 | Exportin-2                                                                                               | 86   | SII |
| Q3TR08 | Fibronectin type III domain-containing protein4                                                          | 119  | SII |
| Q8VHX6 | Filamin-C                                                                                                | 40   | SII |
| P58462 | Forkhead box protein P1                                                                                  | 155  | SII |
| Q99JB6 | Forkhead box protein P3                                                                                  | 100  | SII |
| Q8VDC1 | FYVE and coiled-coil domain-containing protein 1                                                         | 46   | SII |
| O88741 | Ganglioside-induced differentiation-associated protein 1                                                 | 96   | SII |
| Q9Z1Z0 | General vesicular transport factor p115                                                                  | 46   | SII |
| Q5SNZ0 | Girdin                                                                                                   | 86   | SII |
| P19157 | Glutathione S-transferase P 1                                                                            | 114  | SII |
| P46425 | Glutathione S-transferase P 2                                                                            | 95   | SII |
| P13707 | Glycerol-3-phosphate dehydrogenase[NAD(+)]_ cytoplasmic                                                  | 73   | SII |
| P36916 | Guanine nucleotide-binding protein-like 1                                                                | 78   | SII |
| O54865 | Guanylate cyclase soluble subunit beta-1                                                                 | 74   | SII |
| Q5PRF0 | HEAT repeat-containing protein 5A                                                                        | 106  | SII |
| P11499 | Heat shock protein HSP 90-beta                                                                           | 47   | SII |
| P59438 | Hermansky-Pudlak syndrome 5 protein homolog                                                              | 107  | SII |
| P70696 | Histone H2B type 1-A                                                                                     | 1016 | SII |
| Q64475 | Histone H2B type 1-B                                                                                     | 1132 | SII |
| Q6ZWY9 | Histone H2B type 1-C/E/G                                                                                 | 1132 | SII |
| P10853 | Histone H2B type 1-F/J/L                                                                                 | 1132 | SII |

|        |                                                                              |      |     |
|--------|------------------------------------------------------------------------------|------|-----|
| Q64478 | Histone H2B type 1-H                                                         | 1132 | SII |
| Q8CGP1 | Histone H2B type 1-K                                                         | 1132 | SII |
| P10854 | Histone H2B type 1-M                                                         | 1132 | SII |
| Q8CGP2 | Histone H2B type 1-P                                                         | 1132 | SII |
| Q64525 | Histone H2B type 2-B                                                         | 1132 | SII |
| Q64524 | Histone H2B type 2-E                                                         | 1132 | SII |
| Q9D2U9 | Histone H2B type 3-A                                                         | 1132 | SII |
| Q8CGP0 | Histone H2B type 3-B                                                         | 1132 | SII |
| P97443 | Histone-lysine N-methyltransferase Smyd1                                     | 66   | SII |
| O08934 | Homeobox protein unc-4 homolog                                               | 120  | SII |
| O35344 | Importin subunit alpha-4                                                     | 58   | SII |
| Q3USB7 | Inactive phospholipase C-like protein 1                                      | 412  | SII |
| O88351 | Inhibitor of nuclear factor kappa-B kinase subunit beta                      | 406  | SII |
| Q9Z1X4 | Interleukin enhancer-binding factor 3                                        | 110  | SII |
| Q9D6R2 | Isocitrate dehydrogenase [NAD] subunit alpha_ mitochondrial                  | 71   | SII |
| O54983 | Ketimine reductase mu-crystallin                                             | 207  | SII |
| P28738 | Kinesin heavy chain isoform 5C                                               | 120  | SII |
| O88447 | Kinesin light chain 1                                                        | 74   | SII |
| L0N7N1 | Kinesin-like protein KIF14                                                   | 139  | SII |
| Q60575 | Kinesin-like protein KIF1B                                                   | 29   | SII |
| B1B1A0 | Lethal(3)malignant brain tumor-like protein 4                                | 85   | SII |
| P60469 | Liprin-alpha-3                                                               | 44   | SII |
| Q8C8U0 | Liprin-beta-1                                                                | 99   | SII |
| Q61790 | Lymphocyte activation gene 3 protein                                         | 101  | SII |
| Q924M7 | Mannose-6-phosphate isomerase                                                | 130  | SII |
| Q3U435 | Matrix metalloproteinase-25                                                  | 89   | SII |
| Q5HZI1 | Microtubule-associated tumor suppressor 1 homolog                            | 27   | SII |
| Q9CW42 | Mitochondrial amidoxime-reducing component 1                                 | 122  | SII |
| Q9CXT8 | Mitochondrial-processing peptidase subunit beta                              | 145  | SII |
| Q920G8 | Mitoferrin-1                                                                 | 77   | SII |
| P97820 | Mitogen-activated protein kinase kinase kinase kinase 4                      | 115  | SII |
| Q8VCM2 | NADPH oxidase organizer 1                                                    | 145  | SII |
| Q61043 | Ninein                                                                       | 47   | SII |
| Q6PIJ4 | Nuclear factor related to kappa-B-binding protein                            | 72   | SII |
| Q99MH5 | Nucleoside diphosphate kinase homolog 5                                      | 253  | SII |
| Q9D478 | Outer dense fiber protein 2-like                                             | 85   | SII |
| P17742 | Peptidyl-prolyl cis-trans isomerase A                                        | 263  | SII |
| Q62009 | Periostin                                                                    | 45   | SII |
| P15331 | Peripherin                                                                   | 45   | SII |
| P35700 | Peroxiredoxin-1                                                              | 112  | SII |
| A6H619 | PHD and RING finger domain-containing protein 1                              | 63   | SII |
| Q8VEM8 | Phosphate carrier protein_ mitochondrial                                     | 298  | SII |
| P70296 | Phosphatidylethanolamine-binding protein 1                                   | 131  | SII |
| O70167 | Phosphatidylinositol 4-phosphate 3-kinase C2 domain-containing subunit gamma | 180  | SII |
| Q9DBJ1 | Phosphoglycerate mutase 1                                                    | 150  | SII |
| Q08481 | Platelet endothelial cell adhesion molecule                                  | 143  | SII |
| Q80UG2 | Plexin-A4                                                                    | 41   | SII |
| Q64028 | Polyhomeotic-like protein 1                                                  | 68   | SII |
| Q3TVI8 | Pre-B-cell leukemia transcription factor- interacting protein 1              | 89   | SII |
| Q8C8T8 | Pre-rRNA-processing protein TSR2 homolog                                     | 91   | SII |



|        |                                                                                 |     |     |
|--------|---------------------------------------------------------------------------------|-----|-----|
| Q62083 | PRKCA-binding protein                                                           | 115 | SII |
| P54823 | Probable ATP-dependent RNA helicase DDX6                                        | 90  | SII |
| P57774 | Pro-neuropeptide Y                                                              | 135 | SII |
| O70374 | Protein CBFA2T2                                                                 | 50  | SII |
| Q9DAF3 | Protein DDI1 homolog 1                                                          | 42  | SII |
| Q9D0F3 | Protein ERGIC-53                                                                | 87  | SII |
| Q80TL7 | Protein MON2 homolog                                                            | 41  | SII |
| O88286 | Protein Wiz                                                                     | 177 | SII |
| Q8BQP8 | Rab11 family-interacting protein 4                                              | 81  | SII |
| Q62172 | RalA-binding protein 1                                                          | 85  | SII |
| Q64487 | Receptor-type tyrosine-protein phosphatase delta                                | 140 | SII |
| Q8CGE9 | Regulator of G-protein signaling 12                                             | 162 | SII |
| Q3UIA2 | Rho GTPase-activating protein 17                                                | 55  | SII |
| P61588 | Rho-related GTP-binding protein RhoE                                            | 214 | SII |
| Q64518 | Sarcoplasmic/endoplasmic reticulum calcium ATPase 3                             | 52  | SII |
| Q60988 | SCL-interrupting locus protein homolog                                          | 160 | SII |
| Q3V129 | Serine/threonine-protein kinase ULK4                                            | 54  | SII |
| Q9EQY0 | Serine/threonine-protein kinase/endo ribonuclease IRE1                          | 143 | SII |
| Q6PD03 | Serine/threonine-protein phosphatase 2A 56 kDa regulatory subunit alpha isoform | 161 | SII |
| Q9CQR6 | Serine/threonine-protein phosphatase 6 catalytic subunit                        | 73  | SII |
| Q8CIE0 | Serpin A11                                                                      | 167 | SII |
| Q923I7 | Sodium/glucose cotransporter 2                                                  | 110 | SII |
| Q9Z0E8 | Solute carrier family 22 member 5                                               | 69  | SII |
| Q91WM1 | Spermatid perinuclear RNA-binding protein                                       | 41  | SII |
| Q80TF6 | StAR-related lipid transfer protein 9                                           | 53  | SII |
| Q8VIM6 | Stereocilin                                                                     | 403 | SII |
| P08228 | Superoxide dismutase [Cu-Zn]                                                    | 206 | SII |
| Q8K4L3 | Supervillin                                                                     | 159 | SII |
| Q8CHC4 | Synaptotagmin-1                                                                 | 92  | SII |
| Q91YE8 | Synaptopodin-2                                                                  | 97  | SII |
| Q8R1Q0 | Syntaxin-19                                                                     | 274 | SII |
| Q9D6E4 | Tetratricopeptide repeat protein 9B                                             | 385 | SII |
| Q3U0M1 | Trafficking protein particle complex subunit 9                                  | 68  | SII |
| Q924A0 | Transcription factor 7-like 2                                                   | 80  | SII |
| Q8BRH0 | Transmembrane and TPR repeat-containing protein 3                               | 114 | SII |
| Q9ERP3 | Tripartite motif-containing protein 54                                          | 66  | SII |
| P05214 | Tubulin alpha-3 chain                                                           | 195 | SII |
| P68368 | Tubulin alpha-4A chain                                                          | 195 | SII |
| Q9JJZ2 | Tubulin alpha-8 chain                                                           | 195 | SII |
| Q7TMM9 | Tubulin beta-2A chain                                                           | 548 | SII |
| Q9CWF2 | Tubulin beta-2B chain                                                           | 539 | SII |
| P99024 | Tubulin beta-5 chain                                                            | 542 | SII |
| Q922F4 | Tubulin beta-6 chain                                                            | 57  | SII |
| Q9R1K7 | Tubulin delta chain                                                             | 127 | SII |
| Q61333 | Tumor necrosis factor alpha-induced protein 2                                   | 188 | SII |
| P48025 | Tyrosine-protein kinase SYK                                                     | 97  | SII |
| Q80WC1 | Ubinuclein-2                                                                    | 59  | SII |
| Q9CWU6 | Ubiquinol-cytochrome-c reductase complex assembly factor 1                      | 422 | SII |
| Q9ES63 | Ubiquitin carboxyl-terminal hydrolase 29                                        | 87  | SII |
| Q6P5E4 | UDP-glucose:glycoprotein glucosyltransferase1                                   | 292 | SII |

|        |                                                                |     |     |
|--------|----------------------------------------------------------------|-----|-----|
| Q9DAD0 | Uncharacterized protein C1orf194 homolog                       | 111 | SII |
| Q99104 | Unconventional myosin-Va                                       | 66  | SII |
| Q3TLD5 | Unconventional prefoldin RPB5 interactor                       | 115 | SII |
| P51163 | Uroporphyrinogen-III synthase                                  | 161 | SII |
| Q91ZJ5 | UTP--glucose-1-phosphate uridylyltransferase                   | 116 | SII |
| P59016 | Vacuolar protein sorting-associated protein33B                 | 119 | SII |
| P29533 | Vascular cell adhesion protein 1                               | 62  | SII |
| P20152 | Vimentin                                                       | 119 | SII |
| Q60932 | Voltage-dependent anion-selective channel protein 1            | 155 | SII |
| Q99KC8 | von Willebrand factor A domain-containing protein 5A           | 60  | SII |
| Q5RJ54 | Zinc finger and SCAN domain-containing protein 26              | 104 | SII |
| Q6NS86 | Zinc finger protein 366                                        | 53  | SII |
| Q69Z99 | Zinc finger protein 512                                        | 70  | SII |
| Q8BGK2 | [Protein ADP-ribosylarginine] hydrolase-like protein 1         | 280 | RII |
| E9Q9A9 | 2'-5'-oligoadenylate synthase 2                                | 85  | RII |
| Q8QZS1 | 3-hydroxyisobutyryl-CoA hydrolase_ mitochondrial               | 115 | RII |
| Q32Q92 | Acyl-coenzyme A thioesterase 6                                 | 51  | RII |
| B7ZCC9 | Adhesion G-protein coupled receptor G4                         | 84  | RII |
| P61208 | ADP-ribosylation factor-like protein 4C                        | 222 | RII |
| Q6P068 | ADP-ribosylation factor-like protein 5C                        | 69  | RII |
| Q60604 | Adseverin                                                      | 51  | RII |
| Q9QZQ1 | Afadin                                                         | 111 | RII |
| P29699 | Alpha-2-HS-glycoprotein                                        | 175 | RII |
| Q8CFA2 | Aminomethyltransferase_ mitochondrial                          | 185 | RII |
| Q9DBR4 | Amyloid beta A4 precursor protein-binding family B member 2    | 227 | RII |
| Q5F259 | Ankyrin repeat domain-containing protein 13B                   | 62  | RII |
| Q80VM7 | Ankyrin repeat domain-containing protein 24                    | 214 | RII |
| Q8BZW2 | Ankyrin repeat domain-containing protein SOWAHB                | 75  | RII |
| Q91YI0 | Argininosuccinate lyase                                        | 90  | RII |
| Q8K363 | ATP-dependent RNA helicase DDX18                               | 84  | RII |
| Q6ZPL9 | ATP-dependent RNA helicase DDX55                               | 159 | RII |
| Q80W49 | Beta/gamma crystallin domain-containing protein 3              | 42  | RII |
| O88428 | Bifunctional 3'-phosphoadenosine 5'- phosphosulfate synthase 2 | 80  | RII |
| B2RQC6 | CAD protein                                                    | 70  | RII |
| Q8VHF2 | Cadherin-related family member 5                               | 107 | RII |
| Q6Q473 | Calcium-activated chloride channel regulator4A                 | 56  | RII |
| A2AHC3 | Calmodulin-regulated spectrin-associated protein 1             | 64  | RII |
| Q0VEJ0 | Centrosomal protein of 76 kDa                                  | 65  | RII |
| Q03059 | Choline O-acetyltransferase                                    | 41  | RII |
| O35218 | Cleavage and polyadenylation specificity factor subunit 2      | 69  | RII |
| Q8CDI7 | Coiled-coil domain-containing protein 150                      | 45  | RII |
| Q8CE13 | Coiled-coil domain-containing protein 17                       | 55  | RII |
| Q80X19 | Collagen alpha-1(XIV) chain                                    | 74  | RII |
| P03953 | Complement factor D                                            | 304 | RII |
| Q9CWX2 | Complex I intermediate-associated protein 30_ mitochondrial    | 59  | RII |
| Q8BLF2 | Cyclin-dependent kinase-like 3                                 | 360 | RII |
| Q99KY4 | Cyclin-G-associated kinase                                     | 166 | RII |
| Q9Z1J3 | Cysteine desulfurase_ mitochondrial                            | 90  | RII |
| Q9CZ13 | Cytochrome b-c1 complex subunit 1_ mitochondrial               | 95  | RII |
| Q8K3G9 | DCC-interacting protein 13-beta                                | 79  | RII |
| Q8CDG3 | Deubiquitinating protein VCIP135                               | 77  | RII |

|        |                                                                       |     |     |
|--------|-----------------------------------------------------------------------|-----|-----|
| P97427 | Dihydropyrimidinase-related protein 1                                 | 136 | RII |
| Q9D8U7 | DTW domain-containing protein 1                                       | 81  | RII |
| Q3V0Q1 | Dynein heavy chain 12_ axonemal                                       | 108 | RII |
| Q8C863 | E3 ubiquitin-protein ligase Itchy                                     | 67  | RII |
| O88196 | E3 ubiquitin-protein ligase TTC3                                      | 109 | RII |
| P55772 | Ectonucleoside triphosphate diphosphohydrolase 1                      | 78  | RII |
| Q6R2P8 | Endonuclease 8-like 2                                                 | 98  | RII |
| Q9CR89 | Endoplasmic reticulum-Golgi intermediate compartment protein 2 O      | 258 | RII |
| Q5D1E7 | Endoribonuclease ZC3H12A                                              | 80  | RII |
| Q3TLP5 | Enoyl-CoA hydratase domain-containing protein 2_ mitochondrial        | 550 | RII |
| O35393 | Ephrin-B3                                                             | 149 | RII |
| Q924P3 | Epididymal-specific lipocalin-8                                       | 148 | RII |
| Q80VP1 | Epsin-1                                                               | 107 | RII |
| Q8C7X2 | ER membrane protein complex subunit 1                                 | 101 | RII |
| P47753 | F-actin-capping protein subunit alpha-1                               | 159 | RII |
| P47757 | F-actin-capping protein subunit beta                                  | 95  | RII |
| P11276 | Fibronectin                                                           | 150 | RII |
| Q91Y97 | Fructose-bisphosphate aldolase B                                      | 78  | RII |
| Q571F8 | Glutaminase liver isoform_ mitochondrial                              | 94  | RII |
| Q8BKV1 | Glypican-2                                                            | 211 | RII |
| Q8VEF1 | GRAM domain-containing protein 1A                                     | 98  | RII |
| Q80TI0 | GRAM domain-containing protein 1B                                     | 113 | RII |
| P48722 | Heat shock 70 kDa protein 4L                                          | 75  | RII |
| A2AJ76 | Hemcentin-2                                                           | 413 | RII |
| P79457 | Histone demethylase UTY                                               | 42  | RII |
| Q80W88 | Homeobox and leucine zipper protein Homez                             | 125 | RII |
| Q08890 | Iduronate 2-sulfatase                                                 | 158 | RII |
| Q91VK4 | Integral membrane protein 2C                                          | 108 | RII |
| Q9WVP9 | Interferon-induced GTP-binding protein Mx2                            | 210 | RII |
| Q80XH2 | Interphotoreceptor matrix proteoglycan 2                              | 71  | RII |
| Q6VH22 | Intraflagellar transport protein 172 homolog                          | 53  | RII |
| Q8BFQ9 | Kelch-like protein 42                                                 | 137 | RII |
| Q3V300 | Kinesin-like protein KIF22                                            | 118 | RII |
| Q3TJ91 | Lethal(2) giant larvae protein homolog 2                              | 193 | RII |
| P62046 | Leucine-rich repeat and calponin homology domain-containing protein 1 | 56  | RII |
| Q8C0R9 | Leucine-rich repeat and death domain- containing protein 1            | 99  | RII |
| Q6P1C6 | Leucine-rich repeats and immunoglobulin-like domains protein 3        | 88  | RII |
| Q5SUF2 | Luc7-like protein 3                                                   | 135 | RII |
| P27782 | Lymphoid enhancer-binding factor 1                                    | 156 | RII |
| Q8CAQ8 | MICOS complex subunit Mic60                                           | 106 | RII |
| P70218 | Mitogen-activated protein kinase kinase kinase 1                      | 78  | RII |
| Q61006 | Muscle_ skeletal receptor tyrosine-protein kinase                     | 57  | RII |
| Q6NZR2 | Myb/SANT-like DNA-binding domain- containing protein 2                | 59  | RII |
| P11247 | Myeloperoxidase                                                       | 308 | RII |
| Q8CI43 | Myosin light chain 6B                                                 | 74  | RII |
| Q61941 | NAD(P) transhydrogenase_ mitochondrial                                | 70  | RII |
| Q91YT0 | NADH dehydrogenase [ubiquinone] flavoprotein 1_ mitochondrial         | 220 | RII |
| P21661 | Neuroendocrine convertase 2                                           | 111 | RII |
| P49117 | Nuclear receptor subfamily 2 group C member2                          | 71  | RII |
| Q8CH40 | Nucleoside diphosphate-linked moiety X motif6                         | 90  | RII |
| Q80UF9 | Otopetrin-3                                                           | 59  | RII |

|        |                                                                              |     |     |
|--------|------------------------------------------------------------------------------|-----|-----|
| A3KGV1 | Outer dense fiber protein 2                                                  | 101 | RII |
| P41593 | Parathyroid hormone/parathyroid hormone- related peptide receptor            | 66  | RII |
| Q9EPL9 | Peroxisomal acyl-coenzyme A oxidase 3                                        | 269 | RII |
| Q5SPL2 | PHD finger protein 12                                                        | 375 | RII |
| Q8BLG0 | PHD finger protein 20                                                        | 65  | RII |
| P26262 | Plasma kallikrein                                                            | 50  | RII |
| P70458 | Plasma serine protease inhibitor                                             | 106 | RII |
| Q8CDU6 | Probable E3 ubiquitin-protein ligase HECTD2                                  | 339 | RII |
| Q6PAV2 | Probable E3 ubiquitin-protein ligase HERC4                                   | 53  | RII |
| Q9CR73 | Proline-rich nuclear receptor coactivator 2                                  | 281 | RII |
| P70403 | Protein CASP                                                                 | 109 | RII |
| Q8VE88 | Protein FAM114A2                                                             | 110 | RII |
| Q8C627 | Protein FAM221B                                                              | 113 | RII |
| Q6NZK5 | Protein hinderin                                                             | 107 | RII |
| Q5DTZ0 | Protein NYNRIN                                                               | 48  | RII |
| O35595 | Protein patched homolog 2                                                    | 69  | RII |
| P97352 | Protein S100-A13                                                             | 190 | RII |
| Q91XY4 | Protocadherin gamma-A4                                                       | 92  | RII |
| Q3UNZ8 | Quinone oxidoreductase-like protein 2                                        | 129 | RII |
| Q60695 | Ral guanine nucleotide dissociation stimulator- like 1                       | 83  | RII |
| Q8C2K5 | RAS protein activator like-3                                                 | 90  | RII |
| Q9CX84 | Regulator of G-protein signaling 19                                          | 131 | RII |
| Q8K4Q0 | Regulatory-associated protein of mTOR                                        | 120 | RII |
| Q91YE7 | RNA-binding protein 5                                                        | 248 | RII |
| Q8BX22 | Sal-like protein 4                                                           | 131 | RII |
| P42208 | Septin-2                                                                     | 255 | RII |
| P98083 | SHC-transforming protein 1                                                   | 117 | RII |
| P42230 | Signal transducer and activator of transcription5A                           | 157 | RII |
| Q8R3P9 | SMC5-SMC6 complex localization factor protein 1                              | 77  | RII |
| Q8C0X8 | Sperm motility kinase X                                                      | 71  | RII |
| Q8BWB1 | Synaptopodin 2-like protein                                                  | 100 | RII |
| Q9JKD8 | T-box transcription factor TBX21                                             | 81  | RII |
| P80318 | T-complex protein 1 subunit gamma                                            | 90  | RII |
| Q8K1H7 | T-complex protein 11-like protein 2                                          | 55  | RII |
| Q3URQ0 | Testis-expressed protein 10                                                  | 54  | RII |
| Q61286 | Transcription factor 12                                                      | 235 | RII |
| Q9EPK8 | Transient receptor potential cation channel subfamily V member 4             | 96  | RII |
| Q80W04 | Transmembrane and coiled-coil domains protein 2                              | 99  | RII |
| Q6GQT5 | Transmembrane protein 151A                                                   | 125 | RII |
| Q01887 | Tyrosine-protein kinase RYK                                                  | 183 | RII |
| Q99NB8 | Ubiquilin-4                                                                  | 102 | RII |
| Q8C2S0 | Ubiquitin carboxyl-terminal hydrolase 44                                     | 69  | RII |
| O08759 | Ubiquitin-protein ligase E3A                                                 | 118 | RII |
| Q8CE97 | Uncharacterized protein C15orf62 homolog_ mitochondrial                      | 194 | RII |
| Q8C456 | WD repeat-containing and planar cell polarity effector protein fritz homolog | 451 | RII |
| Q8BGF3 | WD repeat-containing protein 92                                              | 398 | RII |
| Q6NZF1 | Zinc finger CCCH domain-containing protein11A                                | 138 | RII |
| O88532 | Zinc finger RNA-binding protein                                              | 102 | RII |
| Q60738 | Zinc transporter 1                                                           | 65  | RII |

<sup>a</sup>Identification is based on proteins ID from UniProt protein database, reviewed only (<http://www.uniprot.org/>).

<sup>b</sup>Proteins with expression significantly altered are organized according to the ratio.

\*Indicates unique proteins in alphabetical order.

**Table S6.** Proteins with expression significantly altered in the gastrocnemius of SIII (A/J, water containing 50 ppm F, exercise) and RIII (129P3/J, water containing 50 ppm F, exercise) mice

| <sup>a</sup> <b>Accession</b> | <b>Protein name</b>                                       | <b>PLGS</b>  | <sup>b</sup> <b>Ratio</b> |
|-------------------------------|-----------------------------------------------------------|--------------|---------------------------|
| <b>number</b>                 |                                                           | <b>Score</b> | <b>SIII: RIII</b>         |
| P32848                        | Parvalbumin alpha                                         | 6797         | 7.10                      |
| P97457                        | Myosin regulatory light chain 2_ skeletal muscle isoform  | 7435         | 5.05                      |
| P21107                        | Tropomyosin alpha-3 chain                                 | 262          | 4.53                      |
| Q64467                        | Glyceraldehyde-3-phosphate dehydrogenase_ testis-specific | 74           | 3.53                      |
| P02104                        | Hemoglobin subunit epsilon-Y2                             | 2664         | 3.49                      |
| P16858                        | Glyceraldehyde-3-phosphate dehydrogenase                  | 14569        | 3.19                      |
| O09165                        | Calsequestrin-1                                           | 1129         | 2.92                      |
| Q3UHK3                        | Protein GREB1                                             | 121          | 2.89                      |
| Q9DBJ1                        | Phosphoglycerate mutase 1                                 | 54           | 2.86                      |
| P02089                        | Hemoglobin subunit beta-2                                 | 2664         | 2.72                      |
| P11404                        | Fatty acid-binding protein_ heart                         | 178          | 2.59                      |
| Q60611                        | DNA-binding protein SATB1                                 | 218          | 2.56                      |
| Q91VW5                        | Golgin subfamily A member 4                               | 227          | 2.53                      |
| P02088                        | Hemoglobin subunit beta-1                                 | 3946         | 2.53                      |
| P13412                        | Troponin I_ fast skeletal muscle                          | 2648         | 2.53                      |
| P07310                        | Creatine kinase M-type                                    | 16395        | 2.48                      |
| P13541                        | Myosin-3                                                  | 2675         | 2.29                      |
| Q5SX39                        | Myosin-4                                                  | 18478        | 2.27                      |
| A2AQP0                        | Myosin-7B                                                 | 428          | 2.23                      |
| P57780                        | Alpha-actinin-4                                           | 80           | 2.14                      |
| P05977                        | Myosin light chain 1/3_ skeletal muscle isoform           | 22171        | 2.10                      |
| Q91Z83                        | Myosin-7                                                  | 5146         | 2.05                      |
| P70402                        | Myosin-binding protein H                                  | 203          | 2.01                      |
| Q5SX40                        | Myosin-1                                                  | 13910        | 1.99                      |
| P17183                        | Gamma-enolase                                             | 806          | 1.97                      |
| Q7TQ48                        | Sarcalumenin                                              | 41           | 1.95                      |
| P52480                        | Pyruvate kinase PKM                                       | 4168         | 1.92                      |
| P17751                        | Triosephosphate isomerase                                 | 3267         | 1.88                      |
| Q9R0Y5                        | Adenylate kinase isoenzyme 1                              | 2915         | 1.84                      |
| O70250                        | Phosphoglycerate mutase 2                                 | 984          | 1.80                      |
| P08249                        | Malate dehydrogenase_ mitochondrial                       | 475          | 1.79                      |
| P01942                        | Hemoglobin subunit alpha                                  | 9144         | 1.77                      |
| P53657                        | Pyruvate kinase PKLR                                      | 737          | 1.77                      |
| P17182                        | Alpha-enolase                                             | 2341         | 1.75                      |
| Q8BFZ3                        | Beta-actin-like protein 2                                 | 14800        | 1.75                      |
| Q3TJD7                        | PDZ and LIM domain protein 7                              | 268          | 1.73                      |
| P60710                        | Actin_ cytoplasmic 1                                      | 49058        | 1.72                      |
| P09041                        | Phosphoglycerate kinase 2                                 | 1520         | 1.72                      |
| P21550                        | Beta-enolase                                              | 4470         | 1.70                      |
| O08638                        | Myosin-11                                                 | 255          | 1.68                      |
| P63260                        | Actin_ cytoplasmic 2                                      | 49058        | 1.67                      |
| P47857                        | ATP-dependent 6-phosphofructokinase_                      | 165          | 1.67                      |
| P0DP28                        | Calmodulin-3                                              | 389          | 1.67                      |
| P68033                        | Actin_ alpha cardiac muscle 1                             | 66606        | 1.65                      |
| P31001                        | Desmin                                                    | 273          | 1.65                      |

|        |                                                         |       |       |
|--------|---------------------------------------------------------|-------|-------|
| P04247 | Myoglobin                                               | 381   | 1.65  |
| Q02566 | Myosin-6                                                | 3955  | 1.65  |
| P09411 | Phosphoglycerate kinase 1                               | 1615  | 1.65  |
| Q9JI91 | Alpha-actinin-2                                         | 177   | 1.63  |
| P0DP27 | Calmodulin-2                                            | 389   | 1.63  |
| P58774 | Tropomyosin beta chain                                  | 6233  | 1.63  |
| P62737 | Actin_ aortic smooth muscle                             | 61441 | 1.62  |
| P13542 | Myosin-8                                                | 8481  | 1.62  |
| Q8VDD5 | Myosin-9                                                | 255   | 1.62  |
| P58771 | Tropomyosin alpha-1 chain                               | 10393 | 1.62  |
| P68134 | Actin_ alpha skeletal muscle                            | 73343 | 1.60  |
| P63268 | Actin_ gamma-enteric smooth muscle                      | 61339 | 1.60  |
| P0DP26 | Calmodulin-1                                            | 389   | 1.60  |
| P06151 | L-lactate dehydrogenase A chain                         | 1760  | 1.55  |
| O88990 | Alpha-actinin-3                                         | 989   | 1.54  |
| Q9D0F9 | Phosphoglucomutase-1                                    | 80    | 1.54  |
| Q5XKE0 | Myosin-binding protein C_ fast-type                     | 2097  | 1.52  |
| P16125 | L-lactate dehydrogenase B chain                         | 309   | 1.51  |
| P07724 | Serum albumin                                           | 636   | 1.51  |
| P09542 | Myosin light chain 3                                    | 4350  | 1.49  |
| Q7TPR4 | Alpha-actinin-1                                         | 57    | 1.48  |
| Q60605 | Myosin light polypeptide 6                              | 1016  | 1.48  |
| P05064 | Fructose-bisphosphate aldolase A                        | 12552 | 1.46  |
| P14152 | Malate dehydrogenase_ cytoplasmic                       | 202   | 1.43  |
| P00342 | L-lactate dehydrogenase C chain                         | 455   | 1.42  |
| P09541 | Myosin light chain 4                                    | 5093  | 1.34  |
| Q99LX0 | Protein DJ-1                                            | 503   | 1.34  |
| Q62234 | Myomesin-1                                              | 80    | 1.32  |
| Q6URW6 | Myosin-14                                               | 258   | 1.31  |
| Q9QZ47 | Troponin T_ fast skeletal muscle                        | 1180  | 1.30  |
| Q99KI0 | Aconitate hydratase_ mitochondrial                      | 100   | 1.28  |
| Q9JKS4 | LIM domain-binding protein 3                            | 618   | 1.28  |
| Q61879 | Myosin-10                                               | 256   | 1.26  |
| O55143 | Sarcoplasmic/endoplasmic reticulum calcium ATPase 2     | 244   | 1.25  |
| P16015 | Carbonic anhydrase 3                                    | 1180  | 1.17  |
| Q6P8J7 | Creatine kinase S-type_ mitochondrial                   | 300   | 1.17  |
| P20801 | Troponin C_ skeletal muscle                             | 1693  | 1.13  |
| P56480 | ATP synthase subunit beta_ mitochondrial                | 1511  | 1.12  |
| Q9WUB3 | Glycogen phosphorylase_ muscle form                     | 4418  | 1.09  |
| Q8R429 | Sarcoplasmic/endoplasmic reticulum calcium ATPase 1     | 946   | 1.07  |
| Q5SPL2 | PHD finger protein 12                                   | 495   | 0.73  |
| Q3UH93 | Plexin-D1                                               | 95    | 0.50  |
| Q80TM9 | Nischarin                                               | 292   | 0.35  |
| Q8CJH3 | Plexin-B1                                               | 169   | 0.30  |
| Q9CZU6 | Citrate synthase_ mitochondrial                         | 51    | 0.27  |
| Q8R4I1 | Ataxin-7                                                | 193   | 0.21  |
| P62259 | 14-3-3 protein epsilon                                  | 81    | SIII* |
| O88986 | 2-amino-3-ketobutyrate coenzyme A ligase_ mitochondrial | 55    | SIII  |
| O08756 | 3-hydroxyacyl-CoA dehydrogenase type-2                  | 73    | SIII  |
| Q921H8 | 3-ketoacyl-CoA thiolase A_ peroxisomal                  | 114   | SIII  |
| Q8VCH0 | 3-ketoacyl-CoA thiolase B_ peroxisomal                  | 114   | SIII  |

|        |                                                     |     |      |
|--------|-----------------------------------------------------|-----|------|
| P20029 | 78 kDa glucose-regulated protein                    | 111 | SIII |
| Q6Q2Z6 | Acyl-coenzyme A thioesterase 5                      | 71  | SIII |
| Q9ESW4 | Acylglycerol kinase_ mitochondrial                  | 50  | SIII |
| Q61315 | Adenomatous polyposis coli protein                  | 73  | SIII |
| P45376 | Aldose reductase                                    | 98  | SIII |
| Q9QYC0 | Alpha-adducin                                       | 80  | SIII |
| P46660 | Alpha-internexin                                    | 58  | SIII |
| Q9D4H4 | Angiotensin-like protein 1                          | 45  | SIII |
| Q9D0I9 | Arginine--tRNA ligase_ cytoplasmic                  | 46  | SIII |
| Q91V24 | ATP-binding cassette sub-family A member 7          | 41  | SIII |
| P12382 | ATP-dependent 6-phosphofructokinase_ liver type     | 71  | SIII |
| P52963 | Band 4.1-like protein 4A                            | 50  | SIII |
| P41183 | B-cell lymphoma 6 protein homolog                   | 69  | SIII |
| P97929 | Breast cancer type 2 susceptibility protein homolog | 66  | SIII |
| P97291 | Cadherin-8                                          | 71  | SIII |
| Q9JKL5 | Calcineurin B homologous protein 3                  | 130 | SIII |
| P58660 | Caspase recruitment domain-containing protein 10    | 42  | SIII |
| Q6A065 | Centrosomal protein of 170 kDa                      | 73  | SIII |
| Q9ESN9 | C-Jun-amino-terminal kinase-interacting protein 3   | 107 | SIII |
| Q9QXK3 | Coatmer subunit gamma-2                             | 47  | SIII |
| Q6NS45 | Coiled-coil domain-containing protein 66            | 51  | SIII |
| Q4QRL3 | Coiled-coil domain-containing protein 88B           | 54  | SIII |
| Q9DBT3 | Coiled-coil domain-containing protein 97            | 97  | SIII |
| P11087 | Collagen alpha-1(I) chain                           | 40  | SIII |
| Q01149 | Collagen alpha-2(I) chain                           | 36  | SIII |
| Q9CZ13 | Cytochrome b-c1 complex subunit 1_ mitochondrial    | 170 | SIII |
| P12787 | Cytochrome c oxidase subunit 5A_ mitochondrial      | 122 | SIII |
| P62897 | Cytochrome c_ somatic                               | 375 | SIII |
| Q91YE9 | Cytosolic 5'-nucleotidase 1B                        | 42  | SIII |
| Q91VU6 | DDB1- and CUL4-associated factor 11                 | 72  | SIII |
| Q8R1A4 | Dedicator of cytokinesis protein 7                  | 28  | SIII |
| Q8VC56 | E3 ubiquitin-protein ligase RNF8                    | 49  | SIII |
| Q6P5F9 | Exportin-1                                          | 86  | SIII |
| P47754 | F-actin-capping protein subunit alpha-2             | 101 | SIII |
| Q61553 | Fascin                                              | 118 | SIII |
| Q8VHX6 | Filamin-C                                           | 28  | SIII |
| O08917 | Flotillin-1                                         | 70  | SIII |
| Q9WTJ4 | Flt3-interacting zinc finger protein 1              | 733 | SIII |
| Q99JB6 | Forkhead box protein P3                             | 55  | SIII |
| Q810T2 | G2/mitotic-specific cyclin-B3                       | 52  | SIII |
| Q5SNZ0 | Girdin                                              | 177 | SIII |
| P03995 | Glial fibrillary acidic protein                     | 59  | SIII |
| C0HKE1 | Histone H2A type 1-B                                | 691 | SIII |
| C0HKE2 | Histone H2A type 1-C                                | 691 | SIII |
| C0HKE3 | Histone H2A type 1-D                                | 691 | SIII |
| C0HKE4 | Histone H2A type 1-E                                | 691 | SIII |
| Q8CGP5 | Histone H2A type 1-F                                | 691 | SIII |
| C0HKE5 | Histone H2A type 1-G                                | 691 | SIII |
| Q8CGP6 | Histone H2A type 1-H                                | 691 | SIII |
| C0HKE6 | Histone H2A type 1-I                                | 691 | SIII |
| Q8CGP7 | Histone H2A type 1-K                                | 691 | SIII |

|        |                                                                     |     |      |
|--------|---------------------------------------------------------------------|-----|------|
| C0HKE7 | Histone H2A type 1-N                                                | 691 | SIII |
| C0HKE8 | Histone H2A type 1-O                                                | 691 | SIII |
| C0HKE9 | Histone H2A type 1-P                                                | 691 | SIII |
| Q6GSS7 | Histone H2A type 2-A                                                | 691 | SIII |
| Q64522 | Histone H2A type 2-B                                                | 201 | SIII |
| Q64523 | Histone H2A type 2-C                                                | 691 | SIII |
| Q8BFU2 | Histone H2A type 3                                                  | 691 | SIII |
| Q8R1M2 | Histone H2A.J                                                       | 691 | SIII |
| Q3THW5 | Histone H2A.V                                                       | 201 | SIII |
| P0C0S6 | Histone H2A.Z                                                       | 201 | SIII |
| P27661 | Histone H2AX                                                        | 201 | SIII |
| P97443 | Histone-lysine N-methyltransferase Smyd1                            | 98  | SIII |
| P18533 | Ig heavy chain V region 733                                         | 108 | SIII |
| Q3USB7 | Inactive phospholipase C-like protein 1                             | 353 | SIII |
| Q99PW8 | Kinesin-like protein KIF17                                          | 36  | SIII |
| Q7TNC6 | Kinesin-like protein KIF26B O                                       | 38  | SIII |
| Q8CDB0 | MAP kinase-interacting serine/threonine- protein kinase 2           | 56  | SIII |
| P15089 | Mast cell carboxypeptidase A                                        | 48  | SIII |
| Q9JI70 | McKusick-Kaufman/Bardet-Biedl syndromes putative chaperonin         | 54  | SIII |
| A2AG06 | Meiosis-specific coiled-coil domain- containing protein MEIOC       | 36  | SIII |
| Q8BI84 | Melanoma inhibitory activity protein 3                              | 107 | SIII |
| Q9EQ20 | Methylmalonate-semialdehyde dehydrogenase[acylating]_ mitochondrial | 78  | SIII |
| Q9JIF9 | Myotilin                                                            | 133 | SIII |
| Q3TKR3 | NACHT_ LRR and PYD domains-containing protein 4C                    | 31  | SIII |
| P19246 | Neurofilament heavy polypeptide                                     | 45  | SIII |
| P08551 | Neurofilament light polypeptide                                     | 45  | SIII |
| P08553 | Neurofilament medium polypeptide                                    | 45  | SIII |
| Q9WU42 | Nuclear receptor corepressor 2                                      | 92  | SIII |
| O88708 | Origin recognition complex subunit 4                                | 43  | SIII |
| B9EJ86 | Oxysterol-binding protein-related protein 8                         | 39  | SIII |
| P48725 | Pericentrin                                                         | 78  | SIII |
| P15331 | Peripherin                                                          | 43  | SIII |
| Q8VD65 | Phosphoinositide 3-kinase regulatory subunit 4                      | 42  | SIII |
| Q99KP6 | Pre-mRNA-processing factor 19                                       | 117 | SIII |
| P54823 | Probable ATP-dependent RNA helicase DDX6                            | 88  | SIII |
| Q8CDU6 | Probable E3 ubiquitin-protein ligase HECTD2                         | 191 | SIII |
| Q812A5 | Proline-rich protein 5                                              | 68  | SIII |
| Q9DAU1 | Protein canopy homolog 3                                            | 167 | SIII |
| Q9DAF3 | Protein DDI1 homolog 1                                              | 48  | SIII |
| Q8R100 | Protein FAM26E                                                      | 95  | SIII |
| Q8BZ32 | Putative Polycomb group protein ASXL2                               | 48  | SIII |
| Q69ZJ7 | RAB6A-GEF complex partner protein 1                                 | 31  | SIII |
| Q5FWH6 | Rho guanine nucleotide exchange factor 15                           | 37  | SIII |
| Q8C2Q3 | RNA-binding protein 14                                              | 127 | SIII |
| Q9WTM3 | Semaphorin-6C                                                       | 179 | SIII |
| Q9DBP0 | Sodium-dependent phosphate transport protein2B                      | 173 | SIII |
| Q922B9 | Sperm-specific antigen 2 homolog                                    | 38  | SIII |
| G3X912 | SprT-like domain-containing protein Spartan                         | 102 | SIII |
| Q6PE84 | Stomatin-like protein 3                                             | 133 | SIII |
| P08228 | Superoxide dismutase [Cu-Zn]                                        | 236 | SIII |



|        |                                                                            |     |      |
|--------|----------------------------------------------------------------------------|-----|------|
| P70327 | T-box transcription factor TBX6                                            | 66  | SIII |
| P20108 | Thioredoxin-dependent peroxide reductase_ mitochondrial                    | 83  | SIII |
| Q61286 | Transcription factor 12                                                    | 96  | SIII |
| Q9WUZ5 | Troponin I_ slow skeletal muscle                                           | 116 | SIII |
| Q6QR59 | TRPM8 channel-associated factor 3                                          | 54  | SIII |
| P68369 | Tubulin alpha-1A chain                                                     | 107 | SIII |
| P05213 | Tubulin alpha-1B chain                                                     | 107 | SIII |
| P68373 | Tubulin alpha-1C chain                                                     | 107 | SIII |
| P05214 | Tubulin alpha-3 chain                                                      | 35  | SIII |
| P68368 | Tubulin alpha-4A chain                                                     | 44  | SIII |
| Q06806 | Tyrosine-protein kinase receptor Tie-1                                     | 49  | SIII |
| Q01887 | Tyrosine-protein kinase RYK                                                | 408 | SIII |
| Q91WQ3 | Tyrosine--tRNA ligase_ cytoplasmic                                         | 71  | SIII |
| Q8C7R4 | Ubiquitin-like modifier-activating enzyme 6                                | 43  | SIII |
| O08759 | Ubiquitin-protein ligase E3A                                               | 100 | SIII |
| Q3TQQ9 | Uncharacterized protein C1orf112 homolog                                   | 37  | SIII |
| Q8CC96 | Uncharacterized protein C6orf222 homolog                                   | 48  | SIII |
| Q9D454 | Uncharacterized protein CXorf49 homolog                                    | 79  | SIII |
| A2AAE1 | Uncharacterized protein KIAA1109                                           | 24  | SIII |
| Q9QY06 | Unconventional myosin-IXb                                                  | 32  | SIII |
| P20152 | Vimentin                                                                   | 71  | SIII |
| Q60932 | Voltage-dependent anion-selective channel protein 1                        | 435 | SIII |
| Q3UR50 | von Willebrand factor A domain-containing protein 5B2                      | 86  | SIII |
| Q5F293 | Zinc finger and BTB domain-containing protein 4                            | 71  | SIII |
| Q61464 | Zinc finger protein 638                                                    | 90  | SIII |
| Q921S7 | 39S ribosomal protein L37_ mitochondrial                                   | 74  | RIII |
| Q9D404 | 3-oxoacyl-[acyl-carrier-protein] synthase_ mitochondrial                   | 56  | RIII |
| Q9JII1 | 72 kDa inositol polyphosphate 5-phosphatase                                | 74  | RIII |
| Q9QY83 | Actin-like protein 7B                                                      | 129 | RIII |
| Q8BK64 | Activator of 90 kDa heat shock protein ATPase homolog 1                    | 58  | RIII |
| Q9QZQ1 | Afadin                                                                     | 101 | RIII |
| Q9DBR4 | Amyloid beta A4 precursor protein-binding family B member 2                | 155 | RIII |
| Q8BZ05 | Arf-GAP with Rho-GAP domain_ ANK repeat and PH domain-containing protein 2 | 91  | RIII |
| Q8R3P0 | Aspartoacylase                                                             | 107 | RIII |
| Q61137 | Astrotactin-1                                                              | 62  | RIII |
| Q9D3D9 | ATP synthase subunit delta_ mitochondrial                                  | 285 | RIII |
| O88738 | Baculoviral IAP repeat-containing protein 6                                | 75  | RIII |
| O88428 | Bifunctional 3'-phosphoadenosine 5'- phosphosulfate synthase 2             | 84  | RIII |
| Q9CWJ9 | Bifunctional purine biosynthesis protein PURH                              | 230 | RIII |
| Q6DFY8 | BMP/retinoic acid-inducible neural-specific protein 2                      | 97  | RIII |
| Q499E0 | BMP/retinoic acid-inducible neural-specific protein 3                      | 158 | RIII |
| Q52KB6 | C2 domain-containing protein 3                                             | 81  | RIII |
| P08607 | C4b-binding protein                                                        | 84  | RIII |
| Q91ZI0 | Cadherin EGF LAG seven-pass G-type receptor 3                              | 76  | RIII |
| Q7TQK5 | Coiled-coil domain-containing protein 93                                   | 82  | RIII |
| Q8R1U1 | Conserved oligomeric Golgi complex subunit4                                | 86  | RIII |
| Q8BLF2 | Cyclin-dependent kinase-like 3                                             | 80  | RIII |
| Q7TMW6 | Cytosolic Fe-S cluster assembly factor NARFL                               | 89  | RIII |
| Q8K3G9 | DCC-interacting protein 13-beta                                            | 182 | RIII |
| Q8N7N5 | DDB1- and CUL4-associated factor 8                                         | 121 | RIII |
| O55111 | Desmoglein-2                                                               | 61  | RIII |

|        |                                                         |     |      |
|--------|---------------------------------------------------------|-----|------|
| Q811D0 | Disks large homolog 1                                   | 41  | RIII |
| P0C6F1 | Dynein heavy chain 2_ axonemal                          | 32  | RIII |
| Q4U2R1 | E3 ubiquitin-protein ligase HERC2                       | 416 | RIII |
| Q9ERK4 | Exportin-2                                              | 118 | RIII |
| A2A870 | Fas-binding factor 1                                    | 359 | RIII |
| P42128 | Forkhead box protein K1                                 | 75  | RIII |
| Q8K284 | General transcription factor 3C polypeptide 1           | 152 | RIII |
| Q9WUU9 | Germinal-center associated nuclear protein              | 96  | RIII |
| Q9R257 | Heme-binding protein 1                                  | 83  | RIII |
| Q9JHU9 | Inositol-3-phosphate synthase 1                         | 83  | RIII |
| P54071 | Isocitrate dehydrogenase [NADP]_ mitochondrial          | 212 | RIII |
| Q8BIJ6 | Isoleucine--tRNA ligase_ mitochondrial                  | 78  | RIII |
| Q69ZK5 | Kelch-like protein 14                                   | 106 | RIII |
| Q49714 | Keratin_ type I cuticular Ha5                           | 65  | RIII |
| Q99M74 | Keratin_ type II cuticular Hb2                          | 88  | RIII |
| Q61097 | Kinase suppressor of Ras 1                              | 448 | RIII |
| Q91W40 | Kinesin light chain 3                                   | 63  | RIII |
| Q8K1S5 | Krueppel-like factor 11                                 | 365 | RIII |
| A2AHG0 | Leucine zipper putative tumor suppressor 3              | 45  | RIII |
| Q3UZ18 | Little elongation complex subunit 2 O                   | 32  | RIII |
| Q99MN1 | Lysine--tRNA ligase                                     | 57  | RIII |
| Q8CAQ8 | MICOS complex subunit Mic60                             | 216 | RIII |
| Q9JM52 | Misshapen-like kinase 1                                 | 86  | RIII |
| Q9Z2I0 | Mitochondrial proton/calcium exchanger protein          | 72  | RIII |
| Q07174 | Mitogen-activated protein kinase kinase kinase8         | 121 | RIII |
| Q91YD3 | mRNA-decapping enzyme 1A                                | 68  | RIII |
| Q9Z2C4 | Myotubularin-related protein 1                          | 86  | RIII |
| Q61578 | NADPH:adrenodoxin oxidoreductase_ mitochondrial         | 56  | RIII |
| E9Q7X7 | Neurexin II                                             | 61  | RIII |
| B0F2B4 | Neuroigin 4-like                                        | 101 | RIII |
| Q99K10 | Neuroigin-1                                             | 107 | RIII |
| Q69ZK9 | Neuroigin-2                                             | 101 | RIII |
| Q02780 | Nuclear factor 1 A-type                                 | 123 | RIII |
| P70255 | Nuclear factor 1 C-type                                 | 123 | RIII |
| Q6ZQH8 | Nucleoporin NUP188 homolog                              | 151 | RIII |
| Q9DCM7 | Nucleus accumbens-associated protein 2                  | 229 | RIII |
| O70209 | PDZ and LIM domain protein 3                            | 169 | RIII |
| Q8CI51 | PDZ and LIM domain protein 5                            | 460 | RIII |
| Q3TKY6 | Peptidyl-prolyl cis-trans isomerase CWC27 homolog       | 145 | RIII |
| P70296 | Phosphatidylethanolamine-binding protein 1              | 227 | RIII |
| Q7TQG1 | Pleckstrin homology domain-containing family A member 6 | 424 | RIII |
| Q8JZX3 | POC1 centriolar protein homolog A                       | 108 | RIII |
| Q91Z31 | Polypyrimidine tract-binding protein 2                  | 65  | RIII |
| Q3URV1 | Protein broad-minded                                    | 101 | RIII |
| Q8K2Y3 | Protein eva-1 homolog B                                 | 281 | RIII |
| Q3UY90 | Protein FAM198A                                         | 78  | RIII |
| Q3HNM7 | Protein inscuteable homolog                             | 192 | RIII |
| O35595 | Protein patched homolog 2                               | 166 | RIII |
| Q80U72 | Protein scribble homolog                                | 284 | RIII |
| Q4KUS2 | Protein unc-13 homolog A                                | 116 | RIII |
| Q64455 | Receptor-type tyrosine-protein phosphatase eta          | 103 | RIII |
| Q8CGE9 | Regulator of G-protein signaling 12                     | 75  | RIII |
| Q8K4Q0 | Regulatory-associated protein of mTOR                   | 111 | RIII |

|        |                                                                  |     |      |
|--------|------------------------------------------------------------------|-----|------|
| Q64518 | Sarcoplasmic/endoplasmic reticulum calcium ATPase 3              | 34  | RIII |
| Q9WUN2 | Serine/threonine-protein kinase TBK1                             | 91  | RIII |
| P97470 | Serine/threonine-protein phosphatase 4 catalytic subunit         | 132 | RIII |
| Q921I1 | Serotransferrin                                                  | 419 | RIII |
| Q8BPQ7 | Small G protein signaling modulator 1                            | 107 | RIII |
| Q8K4L3 | Supervillin                                                      | 57  | RIII |
| Q9D818 | Suppressor APC domain-containing protein 2                       | 74  | RIII |
| Q6A028 | Switch-associated protein 70                                     | 63  | RIII |
| Q8CHC4 | Synaptojanin-1                                                   | 188 | RIII |
| Q91YE8 | Synaptopodin-2                                                   | 44  | RIII |
| Q62288 | Testican-1                                                       | 92  | RIII |
| Q2TV84 | Transient receptor potential cation channel subfamily M member 1 | 292 | RIII |
| Q9EPK8 | Transient receptor potential cation channel subfamily V member 4 | 79  | RIII |
| Q91VP7 | Transmembrane protein 101                                        | 78  | RIII |
| Q99PP6 | Tripartite motif-containing protein 34A                          | 90  | RIII |
| Q9CWH5 | tRNA (guanine(10)-N2)-methyltransferase homolog                  | 185 | RIII |
| Q9D0C4 | tRNA (guanine(37)-N1)-methyltransferase                          | 80  | RIII |
| Q9R0M8 | UDP-galactose translocator                                       | 257 | RIII |
| E9Q035 | Uncharacterized protein                                          | 122 | RIII |
| F8VQB6 | Unconventional myosin-X                                          | 136 | RIII |

<sup>a</sup>Identification is based on proteins ID from UniProt protein database, reviewed only (<http://www.uniprot.org/>).

<sup>b</sup>Proteins with expression significantly altered are organized according to the ratio.

\*Indicates unique proteins in alphabetical order.
